# Supplementary material for: The climate in Poland (Central Europe) in the first half of the last millennium, revisited
Source: Copernicus journal article supplement (doi:10.5194/egusphere-2023-1143), 2023-06-19
Supplement: Supplementary file 1 [file egusphere-2023-1143-supplement.pdf]

1 **The climate in Poland (Central Europe) in the first half of the last**  
 2 **millennium, revisited**

3 Rajmund Przybylak <sup>1,2</sup>; Piotr Oliński <sup>2,3</sup>; Marcin Koprowski <sup>2,4</sup>; Elżbieta Szychowska-Krapiec <sup>5</sup>;  
 4 Marek Krapiec <sup>e</sup>; Radosław Puchałka <sup>2,4</sup>

5

6

7 Supplemental material

8

9 Table S1. Number of weather notes/excerpts for Poland available in historical sources for the period 1001–  
 10 1500

| Decade    | DJF | MAM | JJA | SON | Season unknown | Number of excerpts |
|-----------|-----|-----|-----|-----|----------------|--------------------|
| 1001-1010 | 2   |     |     |     | 1              | 3                  |
| 1011-1020 |     |     |     |     | 2              | 2                  |
| 1021-1030 |     |     |     |     | 1              | 1                  |
| 1031-1040 |     |     |     |     |                |                    |
| 1041-1050 |     |     |     |     |                |                    |
| 1051-1060 |     |     |     |     |                |                    |
| 1061-1070 | 2   |     |     |     |                | 2                  |
| 1071-1080 | 1   |     |     |     |                | 1                  |
| 1081-1090 |     |     | 1   |     |                | 1                  |
| 1091-1100 |     |     | 2   | 1   |                | 3                  |
| 1101-1110 |     |     |     |     | 1              | 1                  |
| 1111-1020 | 3   | 1   | 1   |     | 1              | 6                  |
| 1121-1130 | 1   | 1   |     |     | 3              | 5                  |
| 1131-1140 |     |     |     |     |                |                    |
| 1141-1150 |     |     |     |     | 1              | 1                  |
| 1151-1160 |     | 1   |     |     | 2              | 3                  |
| 1161-1170 |     |     |     |     | 1              | 1                  |

|                        |           |           |           |           |           |            |
|------------------------|-----------|-----------|-----------|-----------|-----------|------------|
| 1171-1180              |           |           |           |           |           |            |
| 1181-1190              |           |           |           |           |           |            |
| 1191-1200              |           |           |           |           |           |            |
| 1201-1210              | 1         |           | 1         |           |           | 2          |
| 1211-1220              |           |           | 1         |           | 1         | 2          |
| 1221-1230              | 2         |           |           | 1         | 6         | 9          |
| 1231-1240              | 1         |           |           |           |           | 1          |
| 1241-1250              | 1         |           |           |           |           | 1          |
| 1251-1260              | 1         | 1         | 2         |           | 1         | 5          |
| 1261-1270              | 1         | 3         | 5         |           |           | 9          |
| 1271-1280              | 8         |           |           |           | 1         | 9          |
| 1281-1290              | 1         |           |           |           |           | 1          |
| 1291-1300              |           |           |           |           | 1         | 1          |
| 1301-1310              | 5         |           | 2         | 5         | 3         | 15         |
| 1311-1320              | 2         |           | 1         | 6         | 5         | 14         |
| 1321-1330              | 22        |           |           | 1         |           | 23         |
| 1331-1340              | 1         | 3         | 2         | 2         | 2         | 10         |
| 1341-1350              | 2         |           |           | 5         | 1         | 8          |
| 1351-1360              |           | 3         |           |           | 2         | 5          |
| <b>Total 1001-1360</b> | <b>57</b> | <b>13</b> | <b>18</b> | <b>21</b> | <b>36</b> | <b>145</b> |
| 1361-1370              | 10        | 5         | 2         | 3         | 2         | 22         |
| 1371-1380              | 8         | 2         | 3         | 1         | 2         | 15         |
| 1381-1390              | 7         | 2         | 4         | 3         | 1         | 17         |
| 1391-1400              | 11        | 2         |           |           | 1         | 14         |
| 1401-1410              | 12        | 5         | 5         | 3         | 3         | 28         |
| 1411-1420              | 9         | 11        | 6         |           | 3         | 29         |
| 1421-1430              | 16        | 9         | 3         |           | 2         | 30         |
| 1431-1440              | 9         | 3         | 15        |           | 1         | 28         |
| 1441-1450              | 9         | 7         | 6         | 2         |           | 24         |
| 1451-1460              | 35        | 32        | 17        | 13        | 1         | 98         |

|                        |            |            |            |           |           |            |
|------------------------|------------|------------|------------|-----------|-----------|------------|
| 1461-1470              | 31         | 17         | 34         | 20        | 3         | 105        |
| 1471-1480              | 28         | 16         | 36         | 14        | 15        | 109        |
| 1481-1490              | 7          | 7          | 13         | 9         | 2         | 38         |
| 1491-1500              | 32         | 12         | 41         | 19        | 6         | 110        |
| <b>Total 1361-1500</b> | <b>224</b> | <b>130</b> | <b>185</b> | <b>87</b> | <b>42</b> | <b>668</b> |

- 11  
12  
13  
14 Table S2. Archival sources used  
15  
16 **Diocesis Archive in Pelplin**  
17 MS. 421, *Chronica Pelplinensis*, t. 1.  
18  
19 **State archive in Gdańsk**  
20 Rękopisy, 300, R/L.I., nr 9.  
21 Rękopisy, 300, R/LI, nr 3: *Annales Prussiae*.  
22  
23 **State archive in Toruń**  
24 Akta Miasta Torunia, kat. II, XIII-28.  
25  
26 **Jagiellonian Library in Kraków**  
27 rękopis nr 5358 (Żegota).  
28  
29 **Geheimes Staatsarchiv Preussischer Kulturbesitz Berlin-Dahlem**  
30  
31 Ordensbriefarchiv, nr 596, nr 602, nr 794, nr 962, nr 1015, nr 1146, nr 1495, nr 1820, nr 1842, nr 3128, nr 4705,  
32 nr 5391 (kopia), nr 6271, nr 6430a, nr 9321, nr 10679, nr 12474, 12481, nr 12482, nr 12755, nr 12803, nr 13932,  
33 nr 14254, nr 14258, nr 14365, nr 14705, nr 14797, nr 14820, nr 14821, nr 14864, nr 14871, nr 15235, nr 15434,  
34 nr 15771, nr 15849, nr 15917, nr 16001, nr 16037, nr 16686, nr 19045, nr 19046, nr 19053, 19054, nr 28501, nr  
35 28563.  
36  
37 Ordensfolianten: 2a, 2c, 3.  
38  
39 **Printed sources (in alphabetical order)**  
40 *Acta capituli Gneznensis*, [in:] *Acta capitulorum nec non iudiciorum ecclesiasticorum*, ed. B. Ulanowski, vol.  
41 1. *Acta capitulorum Gneznensis, Poznaniensis et Vladislaviensis (1408–1530) (Monumenta medii aevi*

42 *historica res gestas Poloniae illustrantia*, t. 13. *Acta capitulorum nec non iudiciorum ecclesiasticorum selecta*,  
43 vol. 1), Cracoviae 1894.

44 *Acta capitulorum nec non iudiciorum ecclesiasticorum*. I (1408–1530), [in:] *Monumenta medii aevi historica*  
45 *res gestas Poloniae illustrantia*, t. 13, Cracoviae 1894.

46 *Acta iudicii ecclesiastici Poznaniensis. Acta capitulorum nec non iudiciorum ecclesiasticorum selecta*, ed. B.  
47 Ulanowski, t. 2 (1403–1530), [in:] *Monumenta medii aevi historica res gestas Poloniae illustrantia*, t. 16,  
48 Cracoviae 1902.

49 *Acta officii consistorialis Leopoliensis antiquissima*, ed. Guilelmus Rolny, Vol. 1 (1482–1489) (*Zabytki*  
50 *dziejowe*, wyd. Towarzystwa Naukowego we Lwowie, II), Lwów 1927.

51 *Acten der Ständetage Preussens, Königlichen Anteils (Westpreussen)*, hrsg. v. F. Thunert, Bd. 1: 1466–1479,  
52 Danzig 1896.

53 *Akta kapitul z wieku XVI wybrane* wydał B. Ulanowski, t. 1, cz. 1, *Akta kapitul poznańskiej i wrocławskiej*  
54 (1519–1578), *Acta historica res gestas Poloniae illustrantia*, t. 13, Kraków 1908.

55 *Akta Stanów Prus Królewskich*, t. 3, cz. 1 (1492–1497), wyd. K. Górski, M. Biskup (Fontes 50), Toruń 1961.

56 *Akta Stanów Prus Królewskich*, t. 4, cz. 1 (1501–1504), wyd. M. Biskup, K. Górski (Fontes 57), Toruń 1966.

57 *Akta Stanów Prus Królewskich*, t. 5, cz. 1 (1506–1508), wyd. M. Biskup (Fontes 64), Warszawa–Poznań 1983.

58 *Akta Stanów Prus Królewskich*, t. 5, cz. 2 (1508–1511), wyd. M. Biskup (Fontes 65), Warszawa–Poznań 1974.

59 Alardus Lambert, *Nordalbingia sive historia rerum praecipuarum in Nordalbinga a temporibus Caroli Magni*  
60 *ad annum praesentim MDCXLIII*, [in:] *Monumenta inedita rerum germanicarum praecipue Cimbricarum, et*  
61 *Megapolensium*, ed. E. J. de Westphalen, t. 1, Lipsiae 1739, szp. 1749–2006.

62 *Annales Anhaltini*, hrsg. v. H. Wäschke, Dessau 1911.

63 *Annales Cuiavienses*, wyd. W. Kętrzyński, [in:] *Monumenta Poloniae Historica*, t. 5, wyd. X. Liske, A.  
64 Lorkiewicz, W. Kętrzyński, T. Wierzbowski, F. Papée, S. Kwiatkowski, Lwów 1888, p. 885–889.

65 *Annales der Universität Greifswald*, [in:] J. G. L. Kosegarten, *Geschichte der Universität Greifswald mit*  
66 *urkundlichen Beilagen*, Th. 2, Greifswald 1856, p. 157–200.

67 *Annales Essenbecenses a. 1020–1323*, ed. G. Waitz, [in:] *Monumenta Germaniae Historica, Scriptorum*, T. 29,  
68 Hannoverae 1892, p. 221–228.

69 *Annales Glogovienses bis z. J. 1493 nebst urkundlichen Beilagen*, [in:] *Scriptores rerum Silesiacarum*, Bd. 10,  
70 hrsg. v. H. Markgraf, Breslau 1877.

71 *Annales Islandorum Regii, a nato Christo ad Annum 1341*, [in:] *Scriptores rerum Danicarum medii aevi*, fec. J.  
72 Langebek, t. 3, Hafniae 1774, p. 1–139.

73 *Annales Olivenses*, wyd. W. Kętrzyński, [in:] *Monumenta Poloniae Historica*, t. 6, wyd. S. Kwiatkowski, L.  
74 Finkel, W. Kętrzyński, W. Bruchnalski, Kraków 1893, p. 360–382.

75 *Annales Posnanienses*, [in:] *Monumenta Poloniae Historica*, t. 5, wyd. X. Liske, A. Lorkiewicz, W.  
76 Kętrzyński, T. Wierzbowski, F. Papée, S. Kwiatkowski, Lwów 1888, p. 874–884.

77 *Annales suecici medii aevi: Svensk medeltidsannalistik*, kommenterad och utg. av Göte Paulsson, Lund 1974.

78 *Annales Wratislaviensis Antiqui et Annales Magistratus Wratislaviensis*, ed. W. Arndt, [in:] *Monumenta*  
79 *Germaniae Historica, Scriptorum*, ed. G. H. Pertz, t. 19, Hannoverae 1866, p. 527–531.  
80 *Annalista Thorunensis*, [in:] *Scriptores rerum Prussicarum*, Bd. 3, hrsg. v. Th. Hirsch, M. Töppen, E. Strehlke,  
81 Leipzig 1866, p. 57–316.  
82 *Annotata chronologica ex variis codicibus in archivis Svecicis*, [in:] *Scriptores rerum Danicarum medii aevi*,  
83 collegit. J. Langebek, t. 4, Hafniae 1776, p. 618–623.  
84 *Antiquitates Plocenses et adjunctarum Prezzin et Elbenav burggraviatus Magdeburgici dioeceseos*  
85 *Gomeranae*, ed. J. Ch. Thorschmidt, Lipsiae 1725.  
86 *Auszüge aus den Annalibus Bardensibus M. Wichmanns*, [in:] *Pommersche Bibliothek*, hrsg. v. J. C. Dähnert,  
87 Th. 2, Greifswald 1751, p. 169–175.  
88 *Auszüge aus Stralsundischen Chroniken vom Jahre 1230 bis 1521*, [in:] *Stralsundische Chroniken*, hrsg. v. G.  
89 Ch. F. Mohnike, D. E. H. Zober (Th. 1. *Johann Berckmanns Stralsundische Chronik und die noch vohandenen*  
90 *Auszüge aus den alten verloren gegangenen Stralsundischen Chroniken nebst einem Anhang, urkundliche*  
91 *Beiträge zur Kirchen- und Schulgeschichte Stralsunds enthaltend*), Stralsund 1833, p. 159–224.  
92 *Bernd Gyseke's Hamburger Chronik 810–1542*, [in:] *Hamburgische Chroniken in niedersächsischer Sprache*,  
93 hrsg. v. J. M. Lappenberg, Hamburg 1861, p. 1–192.  
94 *Bernt Stegmann's Hanseatische Chronik*, hrsg. v. Th. Hirsch, [in:] *Scriptores rerum Prussicarum*, Bd. 5, hrsg.  
95 v. Th. Hirsch, M. Töppen, E. Strehlke, Leipzig 1874, p. 544–577.  
96 *Broderi Boissen Chronicon Slesvicense ab initio christianae religionis in provinciam invectae usque ad annum*  
97 *1530*, [in:] *Scriptores rerum Germanicarum praecipue Saxoniarum*, t. 3, ed. J. B. Mencken, Lipsiae 1730, p.  
98 564–630.  
99 *Bugenhagens Hamburgische Kirchenordnung*, hrsg. v. C. Mönckeberg, Hamburg 1861.  
100 *Calendarium Plocense*, wyd. W. Kętrzyński, [in:] *Monumenta Poloniae Historica*, t. 5, wyd. X. Liske, A.  
101 Lorkiewicz, W. Kętrzyński, T. Wierzbowski, F. Papée, S. Kwiatkowski, Lwów 1888, p. 44–461.  
102 Caspar Henneberger, *Erclerung der Preüssischen grössern Landtaffel oder Mappen*, Königspersg 1595.  
103 Caspar Schütz, *Historia rerum Prussicarum*, Zerbst 1592.  
104 *Caspar Weinreichs Danziger Chronik*, hrsg. v. Th. Hirsch, [in:] *Scriptores rerum Prussicarum*, Bd. 4, hrsg. v.  
105 Th. Hirsch, M. Töppen, E. Strehlke, Leipzig 1870, p. 725–800.  
106 *Catalogus abbatum Saganensium*, [in:] *Scriptores rerum Silesiacarum*, Bd. 1, hrsg. v. Gustav Adolf Stenzel,  
107 Breslau 1835, p. 173–528.  
108 *Christoph Beyer des ältern Danziger Chronik*, [in:] *Scirptores rerum Prussicarum*, Bd. 5, hrsg. v. M. Hirsch, T.  
109 Töppen, E. Strehlke, Leipzig 1874, p. 440–491.  
110 Christoph Manlii, *Gorlicensis patricii commentariorum rerum Lusaticarum Libri VII*, [in:] *Scriptores rerum*  
111 *Lusaticarum*, ed. Ch. G. Hoffmann, Vol. 1, Lipsia–Budissa 1719, p. 99–468.  
112 *Chronica abbatum Beatae Mariae Virginis in Arena*, [in:] *Scriptores rerum Silesiacarum*, Bd. 2, hrsg. v. G. A.  
113 Stenzel, Breslau 1839, p. 156–286.

114 *Chronica Bychovca*, [in:] *Polnoe sobranie russkikhletopisej*, t. 32, pod red. zb., Moskva 1975, p. 128–173.

115 *Chronica novella de quarto opere bis 1435 Lüneburger Handschrift (Fassung D) und Cronica novella de*

116 *secundo opere bis 1423 Linköpinger Handschrift (Fassung B)*, [in:] *Chronica novella des Hermann Korner*,

117 hrsg. v. J. Schwalm, Göttingen 1895, p. 135–532.

118 *Chronica novella des Hermann Korner*, hrsg. v. J. Schwalm, Göttingen 1895.

119 *Chronica oder Handbüchlein Danziger Geschichte*, gedruckt durch J. Rhode, Danzig 1594, hrsg. v. F.

120 Schwarz, „Heimatblätter des deutscher Heimatbundsens“, Jg. 3, H. 3–4. Danzig 1926.

121 *Chronica principium Poloniae*, [in:] *Scriptores rerum Silesiacarum*, t. 1, hrsg. v. G. A. Stenzel, Breslau 1835,

122 p. 38–172.

123 *Chronicon monasterii Claratumbensis ordinis cisterciensis auctore fratre Nicolao de Cracovia*, wyd. W.

124 Kętrzyński, [in:] *Monumenta Poloniae Historica*, t. 6, wyd. S. Kwiatkowski, L. Finkel, W. Kętrzyński, W.

125 Bruchnalski, Kraków 1893, p. 429–480.

126 *Chronicon Sclavicum, quod vulgo dicitur parochi Suselensis*, hrsg. v. E. Th. Laspeyres, Lübeck 1865.

127 *Chronicon terrae Misnensis*, publ. B. G. Struvius, [in:] *Scriptores rerum Germanicarum praecipue*

128 *Saxonicarum*, ed. J. B. Mencken, Lipsiae 1728, t. 2, szp. 313–376.

129 *Chronicon Theodorici Engelhusii, continens res ecclesiae et reipublicae ab orbe condito ad ipsius usque*

130 *tempora*, [in:] *Scriptorum Brunsvicensia illustrantium tomus secundus*, ed. G. W. Leibniz, Hanoverae 1710, p.

131 977–1143.

132 *Chronik des Jacob Twinger von Königshofen 1400 (1415)*, [in:] *Die Chroniken der deutschen Städte vom 14.*

133 *bis ins 16. Jahrhundert*, Bd. 9 (*Die Chroniken der oberrheinischen Städte. Straßburg*, Bd. 2), Leipzig 1871.

134 *Chronik des Klosters Ribnitz*, oryginał, k. 71v–72r na stronie internetowej [https://digitale-bibliothek-](https://digitale-bibliothek-mv.de/viewer/fullscreen/PPNlhasn1121nr2/143/)

135 [mv.de/viewer/fullscreen/PPNlhasn1121nr2/143/](https://digitale-bibliothek-mv.de/viewer/fullscreen/PPNlhasn1121nr2/143/) [access 5.03.2023].

136 *Chronik Michael Steinbergs*, hrsg. v. Th. Schönborn, [in:] *Scriptores rerum Silesiacarum*, Bd. 11

137 (*Schweidnitzer Chronisten des XVI. Jahrhunderts*, hrsg. v. A. Schimmelpfennig, Th. Schönborn), Breslau 1878,

138 p. 117–176.

139 *Chronologia ab anno 266 ad 1430*, [in:] *Scriptores rerum Suecicarum medii aevi*, ed. E. M. Fant, t. 1, Upsalae

140 1818, p. 22–32.

141 *Chronologia Rerum Danicarum Secunda, auctore Cornelio Hamsfortio Simbro Ab Anno Christi DCLXXXVII.*

142 *ad Annum MCCCCXLVIII.*, [in:] *Scriptores Rerum Danicarum medii aevi*, ed. J. Langebek, t. 1, Hafniae 1772,

143 p. 266–334.

144 *Chronologia vetusta ab anno 1298 ad annum 1473*, [in:] *Scriptores rerum Suecicarum medii aevi*, ed. E. M.

145 Fant, t. 1, Upsalae 1818, p. 92–99.

146 *Codex epistolaris Vitoldi Magni Ducis Lithuaniae 1376–1430*, coll. A. Prochaska (*Monumenta Medii Aevi*

147 *Historica Res Gestas Poloniae Illustrantia*, t. 6), Cracoviae 1882.

148 *Compilatoris veteris Trzemesznensis fragmenta*, wyd. W. Kętrzyński, [in:] *Monumenta Poloniae Historica*, t. 5,  
149 wyd. X. Liske, A. Lorkiewicz, T. Wierzbowski, W. Kętrzyński, F. Papée, S. Kwiatkowski, Lwów 1888, p.  
150 818–840.

151 Cornelius Hamsfortius Cimber, *Chronologia Rerum Danicarum Secunda ab anno Christi DCLXXXVII ad*  
152 *annum MCCCCXLVIII*, [in:] *Scriptores rerum Danicarum medii aevi*, coll. J. Langebek, t. 1, Hafniae 1772, p.  
153 266–344.

154 Cromeri Martini, *De origine et rebus gestis Polonorum libri XXX*, Basileae 1558.

155 Curicke R., *Der Stadt Dantzig Historische Beschreibung Worinne Von dero Ursprung, Situation, Regierungs-*  
156 *Art, geführten Kriegen, Religions- und Kirchen- Wesen aufrlich gehandelt wird*, Amsterdam–Dantzig 1687.

157 *De expulsione Iudaeorum*, wyd. A. Semkowicz, [in:] *Monumenta Poloniae Historica*, t. 3, wyd. A. Bielowski,  
158 Lwów 1878, p. 785–789.

159 *Der sogenannten Rufus-Chronik zweiter Theil von 1395–1430*, hrsg. v. K. Koppmann, [in:] *Die Chroniken der*  
160 *deutschen Städte vom 14. bis ins 16. Jahrhundert*, Bd. 28 (*Die Chroniken der niedersächsischen Städte.*  
161 *Lübeck*, Bd. 3), Leipzig 1902, p. 1–342.

162 *Detmar-Chronik von 1101–1395 mit der Fortsetzung von 1395–1400 (zunächst bis 1386)*, hrsg. v. K.  
163 Koppmann, [in:] *Die Chroniken der niedersächsischen Städte. Lübeck*, Bd. 1, Leipzig 1884, p. 189–597.

164 *Diarium Fratrum Minorum Stockholmensium ab a. 1008 ad a. 1502*, [in:] *Scriptores rerum Suesicarum medii*  
165 *aevi*, ed. E. M. Fant, t. 1, Upsala 1818, p. 67–83.

166 *Diarium Minoritarum Wisbyensium ab anno 686 ad annum 1525*, [in:] *Scriptores rerum Suecicarum medii*  
167 *aevi*, ed. E. M. Fant, t. 1, Upsalae 1818, p. 32–39.

168 *Die älteste Thorner Stadtchronik*, hrsg. v. M. Töppen, „Zeitschrift des Westpreußischen Geschichtsvereins“, H.  
169 42, 1900, p. 117–181.

170 *Die Aufzeichnungen des Thorner Pfarrers Hieronymus Waldau (1190–1495)*, hrsg. v. O. Günther, „Zeitschrift  
171 des Westpreussischen Geschichtsvereins“, H. 49, 1907, p. 221–251.

172 *Die Bremer Chronik von Rinesberch, Schene und Hemeling*, [in:] *Bremen. Die Chroniken der*  
173 *niedersächsischen Städte*, Bd. 37, hrsg. v. H. Meinert, Bremen 1968.

174 *Die Chronik Heinrichs von Balsee, Stadtschreibers zu Wismar*, ed. J. Crull, „Jahrbücher des Vereins für  
175 mecklenburgische Geschichte und Altertumskunde“, Jg. 43, 1878, p. 165–186.

176 *Die Chronica Novella des Hermann Korner*, hrsg. von J. Schwalm, Göttingen 1895.

177 *Die domstiftlichen Jahrbücher von 1388–1530, die älteste bekannte erzählende Geschichtsquelle Bautzens*,  
178 hrsg. v. R. Needon, [in:] „Bautzener Geschichts-Blätter“, Jg. 1, 1909, p. 9–11.

179 *Die Lateinische Chronik des Klosters Ribnitz*, [in:] *Die Chroniken des Klosters Ribnitz*, bearb. v. F. Techen,  
180 (*Mecklenburgische Geschichtsquellen*), Schwerin 1909.

181 *Die Magdeburger Schöppenchronik*, [in:] *Die Chroniken der deutschen Städte vom 14. bis ins 16. Jahrhundert*,  
182 Bd. 7 (*Die Chroniken der niedersächsischen Städte. Magdeburg*, Bd. 1), Leipzig 1869.

183 *Die Meissner Chronik. Von Erbauung der Stadt, bis zum Jahre 1588*, hrsg. v. Moritz Grünewald, Th. 1, Hayn  
184 1829.

185 *Die mittlere Chronik von Oliva (1356–1545)*, [in:] *Scriptores Rerum Prussicarum*, Bd. 5, hrsg. v. Th. Hirsch,  
186 M. Töppen, E. Strehlke, Leipzig 1874, p. 624–647.

187 *Die preussischen Geschichtschreiber des XVI. und XVII. Jahrhunderts*, hrsg. v. M. Toeppen, Leipzig 1881.

188 *Die Ratschronik von 1438–1482 (3. Fortsetzung d. Detmar-Chronik 2. Teil)*, [in:] *Chroniken der deutschen*  
189 *Städte*, Bd. 31 (*Die Chroniken der niedersächsischen Städte. Lübeck*, Bd. 5, Th. 1), Lübeck–Stuttgart 1968, p.  
190 1–285.

191 *Die Thommendorfsche Familienchronik*, hrsg. v. A. Schimmelpfennig, [in:] *Scriptores rerum Silesiacarum*, Bd.  
192 11 (*Schweidnitzer Chronisten des XVI. Jahrhunderts*), hrsg. v. A. Schimmelpfennig, Th. Schönborn, Breslau  
193 1878, p. 1–116.

194 *Diplomata monasterii Clarae Tumbae*, wyd. E. Janota, F. K. Piekosiński, Kraków 1865.

195 *Eine alte Stralsunder Chronik*, hrsg. v. E. Zober, Stralsund 1842.

196 *Erste Fortsetzung der Detmar-Chronik von 1395–1399*, hrsg. v. K. Koppmann, [in:] *Die Chroniken der*  
197 *deutschen Städte vom 14. bis ins 16. Jahrhundert*, Bd. 26, Leipzig 1899 (*Die Chroniken der niedersächsischen*  
198 *Städte. Lübeck*, Bd. 2), p. 73–114.

199 *Eyn kort uttoch der Wendeschen cronicon van etliken scheften disser lande unde stede*, [in:] *Hamburgische*  
200 *Chroniken in niedersächsischer Sprache*, hrsg. v. J. M. Lappenberg, Hamburg 1861, p. 229–299.

201 Faust L., *Geschicht- und Zeit-Büchlein der weitberühmten Churfürstlichen Stadt Meissen*, Dresden 1588.

202 *Fortsetzung zu Peter von Dusburg's Chronik von Conrad Bitschin*, bearb. v. M. Töppen, [in:] *Scriptores Rerum*  
203 *Prussicarum*, Bd. 3, hrsg. v. Th. Hirsch, M. Töppen, E. Strehlke, Leipzig 1866, p. 472–506.

204 *Franciscanermunken Peder Olsens collectanae (1104–1487)*, [in:] E. Jorgensen, *Annales Danici medii aevi*,  
205 Köbenhavn 1920, p. 203–211.

206 *Gdańska kronika Bernta Stegmanna (1528)*, kom. i edycja J. Mozdzeń, przy współpr. K. Stöbener i M.  
207 Sumowskiego (*Towarzystwo Naukowe w Toruniu, Fontes 117*), Toruń 2019.

208 *Georgii Fabricii Chemnicensis Annalium urbis Misnae*, [in:] *Georgii Fabricii Chemnicensis Rerum*  
209 *Misnicarum libri VII*, Ienae 1597, p. 1–140.

210 *Georgii Fabricii Chemnicensis Rerum Misnicarum libri VII*, Ienae 1597.

211 *Geschichte von wegen eines Bundes von Landen und Steten*, hrsg. v. M. Toeppen, [in:] *Scriptores rerum*  
212 *Prussicarum*, Bd. 4, hrsg. v. Th. Hirsch, M. Töppen, E. Strehlke, Leipzig 1870, p. 71–211.

213 Gomolcke D., *Fortsetzung der Wasser-Historie in Ober- und Nieder-Schlesien*, Breßlau 1736.

214 Gomolcke D., *Historische Beschreibung derer grossen Theurungen, Hungerund Kummer-Jahre*, Breslau 1737.

215 Graf K., *Ein Fragment (15. Jahrhundert) der Chronica Novella des Hermann Korner im Riksarkivet*  
216 *Stockholm*, <https://archivalia.hypotheses.org/111231> [access 14.03.2021].

217 Hafftitius Petrus, *Microcronicon Marchium*, 1599 (1388–1598), [in:] *Novus Codex diplomaticus*  
218 *Brandenburgensis*, ed. A. F. Riedel, IV. Hauptteil, Bd. 1, Berlin 1862, p. 46–167.



- 219 *Hamburger Chronik vom Jahre 799 bis 1559*, [in:] *Hamburgische Chroniken in niedersächsischer Sprache*,  
 220 hrsg. v. J. M. Lappenberg, Hamburg 1861, p. 377–478.
- 221 *Hanserecense*, Bd. 3, hrsg. v. K. Koppmann, Leipzig 1875.
- 222 Hennenberger C., *Erclerung der preußischen größern Landtafel oder Mappen*, Königsberg 1595.
- 223 Herbut Ioann, *Chronica sive Historiae Polonicae*, Basileae 1553.
- 224 *Hermanni de Warteberge Chronicon Livoniae*, hrsg. v. E. Strehlke, [in:] *Scriptores rerum Prussicarum*, Bd. 2,  
 225 hrsg. v. Th. Hirsch, M. Töppen, E. Strehlke, Leipzig 1863, p. 9–116.
- 226 Höhlbaum K., *Ein Fragment Danziger Annalen (1343–1458)*, „Hansische Geschichtsblätter“, Bd. 3, 1878, p.  
 227 175–180.
- 228 *Incerti Auctoris chronicon Danicum ab anno 1268 ad annum 1523*, [in:] *Scriptores Rerum Danicarum medii*  
 229 *aevi*, ed. J. Langebek, t. 6, Havniae 1786, p. 219–247.
- 230 *Jacob Lubbe's Familienchronik*, [in:] *Scriptores rerum Prussicarum*, Bd. 5, hrsg. v. Th. Hirsch, M. Töppen, E.  
 231 Strehlke, Leipzig 1874, p. 692–724.
- 232 *Jana Długosza Roczniki, czyli Kroniki sławnego Królestwa Polskiego*, ks. 9: 1300–1370, Warszawa 1975.
- 233 *Jan Długosz, Roczniki, czyli Kroniki sławnego Królestwa Polskiego*, ks. 10: 1370–1405, Warszawa 1981.
- 234 *Jan Długosz, Roczniki, czyli Kroniki sławnego Królestwa Polskiego*, ks. 10 i 11: 1406–1412, Warszawa 1982.
- 235 *Jan Długosz, Roczniki, czyli Kroniki sławnego Królestwa Polskiego*, ks. 11: 1413–1430, Warszawa 1985.
- 236 *Jan Długosz, Roczniki, czyli kroniki sławnego Królestwa Polskiego*, ks. 11 and 12: 1431–1444, Warszawa  
 237 2004.
- 238 *Jan Długosz, Roczniki, czyli Kroniki sławnego Królestwa Polskiego*, ks. 12: 1445–1461, Warszawa 2004.
- 239 *Jan Długosz, Roczniki, czyli Kroniki sławnego Królestwa Polskiego*, ks. 12: 1462–1480, Warszawa 2009.
- 240 Joannes Leo, *Historia Prusiae*, Brunsbergae 1725.
- 241 *Joannis Długossi Annales seu Cronicae incliti Regni Poloniae*, lib. 9: 1300–1370, Varsaviae 1978.
- 242 *Joannis Długossii Annales seu Cronicae incliti Regni Poloniae*, lib. 10: 1370–1405, Varsaviae 1985.
- 243 *Joannis Długossii Annales seu Cronicae incliti Regni Poloniae*, lib. 10 et 11: 1406–1412, Varsaviae 1997.
- 244 *Joannis Długossii Annales seu Cronicae incliti Regni Poloniae*, lib. 11: 1413–1430, Varsaviae 2000.
- 245 *Joannis Długossii Annales seu Cronicae incliti Regni Poloniae*, lib. 11 et 12: 1431–1444, Varsaviae 2001.
- 246 *Joannis Długossii Annales seu Cronicae incliti Regni Poloniae*, lib. 12: 1445–1461, Cracoviae 2003.
- 247 *Joannis Długossii Annales seu Cronicae incliti Regni Poloniae*, lib. 12: 1462–1480, Cracoviae 2005.
- 248 *Joannis Długosz senioris canonici Cracoviensis Liber beneficiorum dioecesis Cracoviensis*, t. 3. *Monasteria*, ed.  
 249 A. Przeździecki, Cracoviae 1864.
- 250 Johann Adolphi's, genannt Neocorus, *Chronik des Landes Dithmarschen*, hrsg. v. F. C. Dahlmann, Bd. 1, Kiel  
 251 1827.
- 252 *Johann Lindaus Geschichte des dreizehnjährigen Krieges*, hrsg. v. Th. Hirsch, [in:] *Scriptores rerum*  
 253 *Prussicarum*, Bd. 4, hrsg. v. Th. Hirsch, M. Töppen, E. Strehlke, Leipzig 1870, p. 490–637.

254 *Johann Russe's Sammlungen und Vorarbeiten zur Chronik des Landes Dithmarschen*, hrsg. v. A. L. J.  
255 Michelsen, „Staatsbürgerliches Magazin, mit besonderer Rücksicht auf die Herzogthümer Schleswig, Holstein  
256 und Lauenburg”, Bd. 9, 1829, p. 695–723.

257 *Johann's von Posilge, Officials von Pomesanien, Chronik des Landes Preussen (von 1360 an, fortgesetzt bis*  
258 *1419)*, [in:] *Scriptores rerum Prussicarum*, Bd. 3, hrsg. v. Th. Hirsch, M. Töppen, E. Strehlke, Leipzig 1866, p.  
259 70–388.

260 *Johannes Bugenhagens Pomerania (Quellen zur Pommerschen Geschichte IV)*, hrsg. v. O. Heinemann, Stettin  
261 1900.

262 Johannes Isaac Pontanus, *Historia rerum Danicarum, qua res post excessum Christophori Bavari,*  
263 *vetustissimae regum Daniae prosapiae regem ultimumed. F. Rostgaard*, [in:] *Monumenta inedita rerum*  
264 *Germanicarum, praecipue Cimbricarum et Megapolensium*, ed. E. J. v. Westphalen, t. 2, Lipsiae 1740, szp.  
265 713–1230.

266 *Johannis Plastwici, Decani Warmienses, Chronicon de vitis episcoporum Warmiensium*, [in:] *Scriptores rerum*  
267 *Warmiensium oder Quellenschriften zur Geschichte Ermlands*, hrsg. v. C. P. Woelky, J. M. Saage, Bd. 1,  
268 Braunsberg 1866, p. 10–132.

269 *Kalendarz krakowski*, [in:] *Najdawniejsze roczniki krakowskie i kalendarz*, wyd. Z. Kozłowska-Budkowa,  
270 *Monumenta Poloniae Historica*, seria II, t. 5, Warszawa 1978.

271 *Karsten Schröder's Ditmarsische Chronik (1040–1616)*, ed. W. G. Kolster, „Zeitschrift der Gesellschaft für  
272 Schleswig-Holsteinische Geschichte”, Bd. 8, 1878, p. 177–273.

273 Kaspar Borgeni, *Rocznik glogowski do roku 1493 (Annales glogovienses bis z. J. 1493)*, oprac. W. Mrozowicz,  
274 Głogów 2013.

275 *Katalog biskupów krakowskich*, wyd. J. Szymański, [in:] *Monumenta Poloniae Historica*, seria II, t. 10, cz. 2,  
276 Warszawa 1974.

277 Kojalowicz A. W., *Historiae Lituanae pars altera, seu de rebus Lituatorum*, Antverpiae 1669.

278 Krantzii A. [...], *Wandalia*, Francofurti 1575.

279 *Kronika klasztoru trzemeszeńskiego*, ed. A. Hirschberg, [in:] *Monumnetu Poloniae Historica*, t. 3, wyd. A.  
280 Bielowski, Lwów 1878, p. 256–263.

281 *Kronika Macieja Strykowskiego. Zbior dzieiopolisow polskich*, t. 2, Warszawa 1766.

282 *Kronika Polska, Marcina Bielskiego, nowo przez Ioach. Bielskiego syna iego wydana*, Kraków 1597.

283 *Kroniki Bernarda Wapowskiego z Radochoniec, cz. ostatnia (1480–1535)*, [in:] *Scriptores rerum Polonicarum*,  
284 t. 2, Cracoviae 1874, p. 1–256.

285 *Latomi M. Bernhardi, Wismariensis Megapolitani, Generalochronicon Megapolitanum omnis aevi, Historiam*  
286 *Regni, Dynastiae, Ducatus et Principatus Mecklenburgici continens*, [in:] *Monumenta inedita rerum*  
287 *Germanicarum, praecipue Simbricar*, ed. E. J. v. Westphalen, tomus 4, Lipsiae 1740, szp. 3–594.

288 *Markvardiga Handelser i Sverige ifran 1220 till 1552*, [in:] *Scriptores rerum Svecicarum medii aevi*, ed. E. M.  
289 Fant, t. 1, Upsaliae 1818, p. 90–91.

290 *Martini Cromeri De origine et rebus gestis Polonorum libri XXX*, Basileae 1558.

291 *Mathias Döring's Fortsetzung der Chronik von Dieterich Engelhusen*, [in:] *Riedel's Codex diplomaticus*

292 *Brandenburgensis*, Haupttheil IV, Bd. 1, Berlin 1862, p. 209–256.

293 *Matricularum Regni Poloniae Summaria*, ed. T. Wierzbowski, t. 3, Varsoviae 1908.

294 Matthias de Lewis, *Chronicon Leodiense*, ed. S. Bormans (Société des bibliophiles liégeois. Publications, 2),

295 Liege 1865.

296 *Memoriale domini Lucae, episcopi Warmienseis*, [in:] *Monumenta historiae Warmienseis*, Bd. 8, hrsg. v. C. P.

297 Woelky, Braunsberg 1889, p. 1–171.

298 Miechowita Maciej, *Chronica Polonorum*, Cracoviae 1521.

299 Murinius Marcin, *Kronika albo krotkie z kronik rozmaitych zebranie, spraw potocznych ziemie z dawna*

300 *slawney pruskiey przez X. Marcina Muriniusa*, wyd. K. W. Wojcicki (*Biblioteka Starożytna Pisarzy Polskich*,

301 IV), Warszawa 1844.

302 Murinius Marcin, *Kronika mistrzów pruskich*, oprac. Z. Nowak, Olsztyn 1989.

303 Nakielski Samuel, *Miechovia sive promptuarium antiquitatum monasterii Miechoviensis studio et opera...*,

304 Cracoviae 1634.

305 *Nekrologium des Stifts Kamenz*, [in:] *Schlesische Nekrologien*, hrsg. v. W. Wattenbach, „Zeitschrift des

306 Vereins für Geschichte und Alterthums Schlesiens”, Bd. 4, 1862, p. 313–337.

307 *Nicolai Henelius ab Hennenfeld annales Silesiae*, [in:] F. W. von Sommersberg, *Silesiacarum Rerum*

308 *Scriptores*, Bd. 2, Lipsiae 1730, p. 197–484.

309 Nicolaus Pol, *Jahrbücher der Stadt Breslau*, Bd. 1, hrsg. v. J. G. Büsching, Breslau 1813.

310 Nicolaus Pol, *Jahrbücher der Stadt Breslau*, Bd. 2, hrsg. v. J. G. G. Büsching, J. G. Kunisch, Breslau 1815.

311 *Ordo missalis secundum ritum laudabilis Ecclesiae Hamburgensis*, [in:] Nordkirchenbibliothek,

312 <https://nkb.nordkirche.de/angebot-service/digitale-bibliothek.html> [access 10.03.2023].

313 Pasek J. Ch., *Pamiętniki*, Wrocław 1952. *Paul Pole's Preussische Chronik*, bearb. v. M. Töppen, [in:]

314 *Scriptores rerum Prussicarum*, Bd. 5, hrsg. v. Th. Hirsch, M. Töppen, E. Strehlke, Leipzig 1874, p. 173–222.

315 Peter Eschenloer, *Geschichte der Stadt Breslau*, hrsg. v. G. Roth, Teilband 2, *Chronik ab 1467 (Quellen und*

316 *Darstellungen zur schlesischen Geschichte*, Bd. 29 I, II), Münster–New York–München–Berlin 2003.

317 *Peter Eschenloer's Geschichten der Stadt Breslau oder Denkwürdigkeiten vom Jahre 1440 bis 1479*, ed. J. G.

318 Kunisch, Bd. 1, Breslau 1827.

319 *Peter Eschenloer's Geschichten der Stadt Breslau*, ed. J. G. Kunisch, Bd. 2, Breslau 1828.

320 *Petri Olai Minoritae Roskildensis Annales Rerum Danicarum, a Cimborum exitu ad An. Chr. 1541*, [in:]

321 *Scriptores rerum Danicarum medii aevi*, ed. J. Langebek, t. 1, Hafniae 1772, p. 148–170.

322 *Petrus de Dusburgk, Chronica Terrae Prussiae*, ed. J. Wenta, S. Wyszomirski, [in:] *Monumenta Poloniae*

323 *Historica*, NS, t. 13, Kraków 2007.

324 *Petrus Eschenloer, Historia Wratislaviensis*, hrsg. v. Hermann Markgraf, [in:] *Scriptores rerum Silesiacarum*,

325 Bd. 7, Breslau 1872.

- 326 *Preußisches Urkundenbuch*, Bd. 6, hrsg. v. K. Conrad, Marburg 2000.
- 327 *Regesta historico-diplomatica Ordinis S. Mariae Theutonicorum 1198–1525*, pars 1, vol. 1, hrsg. v. W.
- 328 Hubatsch, Göttingen 1948.
- 329 *Rocznik Jana z Targowiska 1386–1491*, wyd. E. Kalitowski, [in:] *Monumenta Poloniae Historica*, t. 3, wyd. A.
- 330 Małecki, W. Kętrzyński, X. Liske, Lwów 1878, p. 232–240.
- 331 *Rocznik małopolski 965–1415*, wyd. A. Bielowski, [in:] *Monumenta Poloniae Historica*, t. 3, wyd. A. Małecki,
- 332 W. Kętrzyński, X. Liske, Lwów 1878, p. 135–202.
- 333 *Rocznik Sędziwoja*, [in:] *Monumenta Poloniae Historica*, t. 2, wyd. A. Bielowski, Lwów 1872, p. 871–880.
- 334 *Rocznik wrocławski dawny 1238–1308 i Rocznik magistratu wrocławskiego 1149–1491*, wyd. A. Bielowski,
- 335 [in:] *Monumenta Poloniae Historica*, t. 3, wyd. A. Małecki, W. Kętrzyński, X. Liske, Lwów 1878, p. 680–688.
- 336 Rzączyński G. P., *Historia naturalis curiosa regni Poloniae, magni ducatus Lituaniae, annexarumque*
- 337 *provinciarum in tractatus XX divisa*, Sandomiriae 1721.
- 338 *Samuel Benjamin Klose's Darstellung der inneren Verhältnisse der Stadt Breslau vom Jahre 1458 bis zum*
- 339 *Jahre 1526*, hrsg. v. G. A. Stenzel, [in:] *Scriptores rerum Silesiacarum*, Bd. 3, Breslau 1847.
- 340 Schultz A., Grünhagen C., *Annalistische Nachlese. Fortsetzung. 1449–1500*, „Zeitschrift für Geschichte und
- 341 Alterthum Schlesiens”, Bd. 9, H. 2, 1869, p. 373–388.
- 342 *Schweidnitzer Chronik des Wenceslaus Thommerndorf*, [in:] *Scriptores rerum Silesiacarum*, Bd. 11, Breslau
- 343 1878.
- 344 *Sigismundi Rosiczii, Sequuntur gesta diversa transactis temporibus facta in Silesia et alibi*, [in:] *Scriptores*
- 345 *rerum Silesiacarum*, Bd. 12, Breslau 1883, p. 37–86.
- 346 *Simon Grunau's Preussische Chronik*, hrsg. v. M. Perlbach (*Die Preussischen Geschichtschreiber des XVI. und*
- 347 *XVII. Jahrhunderts*), Bd. 1, Leipzig 1876.
- 348 *Simon Grunau's preussische Chronik*, Bd. 2 (*Die preussischen Geschichtschreiber des XVI. und XVII.*
- 349 *Jahrhunderts*), hrsg. v. M. Perlbach, R. Philippi, P. Wagner, Leipzig 1889.
- 350 Skalitzy A., *Excerpte aus der handschriftlichen Chronik eines Habelschwerdtes vom Jahre 1618*,
- 351 „Vierteljahrsschrift für Geschichte und Heimatskunde der Grafschaft Glatz”, Jg. 7, 1887/88, p. 82–89, 179–
- 352 187, 274–283, 344–352.
- 353 *Spominki bochnieńskie 1423–1447*, wyd. S. Lukas, [in:] *Monumenta Poloniae Historica*, t. 3, wyd. A. Małecki,
- 354 W. Kętrzyński, X. Liske, Lwów 1878, p. 243–245.
- 355 *Spominiki kazimierskie 1422–1473*, wyd. A. Bielowski, [in:] *Monumenta Poloniae Historica*, t. 3, wyd. A.
- 356 Małecki, W. Kętrzyński, X. Liske, Lwów 1878, p. 242–243.
- 357 *Spominki pilzneńskie 1486–1548*, wyd. A. Bielowski, [in:] *Monumenta Poloniae Historica*, t. 3, wyd. A.
- 358 Małecki, W. Kętrzyński, X. Liske, Lwów 1878, p. 245–249.
- 359 *Spominki wiślickie 1305–1479*, wyd. A. Bielowski, [in:] *Monumenta Poloniae Historica*, t. 3, wyd. A. Małecki,
- 360 W. Kętrzyński, X. Liske, Lwów 1878, p. 124–126.

- 361 *Spominki zakonnika świętokrzyskiego 1434–1454*, wyd. T. Wierzbowski, [in:] *Monumenta Poloniae Historica*,  
 362 t. 3, wyd. A. Małecki, W. Kętrzyński, X. Liske, Lwów 1878, p. 411–414.
- 363 *Stralsundische Chronik B.*, [in:] *Zwei Stralsundische Chroniken des funfzehnten Jahrhunderts*, hrsg. v. R.  
 364 Baier, Stralsund 1893, p. 13–47.
- 365 *Stralsundische Chroniken*, hrsg. v. G. Ch. F. Mohnike, D. E. H. Zober, Th. 1, Stralsund 1833.
- 366 *Thorner Denkwürdigkeiten von 1345–1547*, hrsg. v. A. Voigt, „Mitteilungen des Copernicus-Vereins für  
 367 Wissenschaft und Kunst zu Thorn”, H. 13, 1904.
- 368 Toeppen M., *Die Elbinger Geschichtsschreiber und Geschichtsforscher in kritischer Uebersicht vorgeführt*,  
 369 „Zeitschrift des Westpreussischen Geschichtsvereins”, H. 32, 1893.
- 370 *Tratziger's Chronica der Stadt Hamburg*, hrsg. v. J. M. Lappenberg, Hamburg 1865.
- 371 Warschauer A., *Die Chronik der Stadtschreiber von Posen*, Posen 1888.
- 372 Weck A., *Der Chur-Fürstlichen Sächsischen weitberuffenen Residentz- und Haupt-Festung Dresden*  
 373 *Beschreibung und Vorstellung*, Nürnberg 1680.
- 374 Weltzel A., *Ratiborer Chronik*, „Zeitschrift des Vereins für Geschichte und Alterthum Silesiens”, Bd. 4, 1862,  
 375 p. 114–125.
- 376 Werchacki R., *Kłęski elementarne w Polsce w latach 1587–1647*, cz. 1: *Zjawiska meteorologiczne, stan*  
 377 *urodzajów i pomory bydła*, „Sprawozdania Towarzystwa Naukowego we Lwowie”, R. 18, 1938, nr 3, p. 321–  
 378 326.
- 379 *Wigand von Marburg. Nowa kronika pruska*, oprac. S. Zonenberg, K. Kwiatkowski, Toruń 2017.
- 380 Zerneke J. H., *Historiae Thoruniensis Naufragae Tabulae oder Kern der Thornischen Chronicke*, Thorn 1711.
- 381 *Zweite Fortsetzung der Detmar-Chronik*, hrsg. v. K. Koppmann, [in:] *Die Chroniken der deutschen Städte*, Bd.  
 382 26 (*Die Chroniken der niedersächsischen Städte. Lübeck*. Bd. 2), Leipzig 1899, p. 119–176.
- 383
- 384 **Catalogues**
- 385 Hellmann G., *Meteorologische Beobachtungen vom XIV. bis XVII. Jahrhundert*, Berlin 1901.
- 386 Hennig R., *Katalog bemerkenswerter Witterungsereignisse von den ältesten Zeiten bis zum Jahre 1800*  
 387 (*Abhandlungen der königlich preussischen meteorologischen Instituts*, II/4), Berlin 1904.
- 388 Namaczyńska S., *Kronika kłęsk elementarnych w Polsce i w krajach sąsiednich w latach 1648–1696*. I.  
 389 *Zjawiska meteorologiczne i pomory* (*Badania z Dziejów Społecznych i Gospodarczych*, nr 23), Lwów 1937.
- 390 Strehlke F., Strehlke E., *Nachrichten über besondere Witterungs-Erscheinungen in Preussen währen des 14.,*  
 391 *15., 16. und 17. Jahrhunderts*, „Altpreussische Monatsschrift”, NF, Bd. 10, 1873, p. 650–660.
- 392 Szewczuk J., *Kronika kłęsk elementarnych w Galicji w latach 1772–1848* (*Badania z Dziejów Społecznych i*  
 393 *Gospodarczych*, nr 35), Lwów 1939.
- 394 Walawender A., *Kronika kłęsk elementarnych w Polsce i w krajach sąsiednich w latach 1450–1586*. I.  
 395 *Zjawiska meteorologiczne i pomory* (*Badania z Dziejów Społecznych i Gospodarczych*, nr 10), Lwów 1932.

396 Walawender A., *Kronika klęsk elementarnych w Polsce i w krajach sąsiednich w latach 1450–1586*. II.  
 397 *Zniszczenia wojenne i pożary (Badania z Dziejów Społecznych i Gospodarczych, nr 11)*, Lwów 1935.  
 398 Weikinn C., *Quellentexte zur Witterungsgeschichte Europas von der Zeitwende bis zum Jahre 1850*, T. 1:  
 399 *Zeitwende-1500*, Berlin 1958; T. 2: *1501–1600*, Berlin 1960; T. 3: *1601–1700*, Berlin 1961; T. 4: *1701–1750*,  
 400 Berlin 1963; T. 5: *1751–1800*, hrsg. v. M. Börngen, G. Tetzlaff, Berlin–Stuttgart 2000; T. 6: *1801–1850*, hrsg.  
 401 v. M. Börngen, G. Tetzlaff, Berlin–Stuttgart 2002.  
 402 *Wyjątki ze źródeł historycznych o nadzwyczajnych zjawiskach hydrologiczno--meteorologicznych na ziemiach*  
 403 *polskich w wiekach od X do XVI*, oprac. R. Girguś, W. Strupczewski, A. Rojecki, Warszawa 1965.

404

405 **Databases**

406 Database: Polskie Towarzystwo Historyczne *Klęski elementarne*: [http://pth.net.pl/projekty/bazy-danych/klęski-](http://pth.net.pl/projekty/bazy-danych/klęski-elementarne)  
 407 [elementarne](http://pth.net.pl/projekty/bazy-danych/klęski-elementarne) [access 14.03.2023].

408 Database: <https://www.euroclimhist.unibe.ch/de/dbsuche/> [access 14.03.2023].

409

410 Table S3. An inventory of weather notes available for the area of Poland (1001–1360)

| Year    | Weather note                                                                                                                                                                                                                                                                                                                            | Source                                                                                                                                                                                                                     |
|---------|-----------------------------------------------------------------------------------------------------------------------------------------------------------------------------------------------------------------------------------------------------------------------------------------------------------------------------------------|----------------------------------------------------------------------------------------------------------------------------------------------------------------------------------------------------------------------------|
| 1069    | Fluminibus glaciali rigore constrictis, imperator Heinricus terram Luttianorum ingressus                                                                                                                                                                                                                                                | Chronica Sigeberti Gemblacensis, in: Monumenta Germaniae Historica, t. 6, p. 362; Chronicon sancti Bavonis scriptum sub finem seculi XV, ed. J.J. de Smet, in: Collection de chroniques Belges inedits, v. 3, 1837, p. 560 |
| 1076/77 | Anno Dominice Incarnationis 1076, gravissima hyems incubuit, adeo ut in Galliis Ararim, Rodanum, Renum, Ligerim, in Germania Albam, Viselam et Danubium, in Italia Eridanum, permaximos fluvios, ut taceatur de minoribus, tanto gelu constringeret, quod mirantibus circumiacentibus incolis, quasi per solidam terram pervii fierent. | La chronique de Saint-Hubert dite cantatorium, ed. K. Hanquet, 1906, p. 98                                                                                                                                                 |
| 1097    | Nimia aquarum inundatione autumpnalis sacio impeditur, quae sterelitatem frugum induxit                                                                                                                                                                                                                                                 | Ioannis Długossii Annales seu Cronicae incliti Regni Poloniae, Lib 3-4, 1970, p. 195; Jan Długosz, Roczniki czyli kroniki sławnego Królestwa Polskiego, ks. 3-4, 2009, p. 236                                              |

|         |                                                                                                                                                                                                                                                                                                                                                                                                                                                                                                                                                                                                                                                                                                                                                                                                                                                                                                                                                                                                                                                                                                                                                                                                                                                                               |                                                                                                                                                                                     |
|---------|-------------------------------------------------------------------------------------------------------------------------------------------------------------------------------------------------------------------------------------------------------------------------------------------------------------------------------------------------------------------------------------------------------------------------------------------------------------------------------------------------------------------------------------------------------------------------------------------------------------------------------------------------------------------------------------------------------------------------------------------------------------------------------------------------------------------------------------------------------------------------------------------------------------------------------------------------------------------------------------------------------------------------------------------------------------------------------------------------------------------------------------------------------------------------------------------------------------------------------------------------------------------------------|-------------------------------------------------------------------------------------------------------------------------------------------------------------------------------------|
| 1108    | [...] et cum ista brumali tempore peregrasse, multis sufficeret ad laborem                                                                                                                                                                                                                                                                                                                                                                                                                                                                                                                                                                                                                                                                                                                                                                                                                                                                                                                                                                                                                                                                                                                                                                                                    | Galli Anonymi Cronica et gesta ducum sive principum Polonorum, ed. K. Maleczyński, in: Monumenta Poloniae Historica, s.n. 1952, p. 111                                              |
| 1110/11 | Item impiger Boleslavus hiemali tempore non quasi desidiosus in otio requevit, sed Prussiam terram aquiloni contiguam, gelu constrictam introivit. [...] Illuc enim introiens, glacie lacuum et paludum pro ponte utebatur, quia nullus aditus alius in illam patriam nisi lacubus et paludibus invenitur.                                                                                                                                                                                                                                                                                                                                                                                                                                                                                                                                                                                                                                                                                                                                                                                                                                                                                                                                                                    | Galli Anonymi Cronica et gesta ducum sive principum Polonorum, ed. K. Maleczyński, in: Monumenta Poloniae Historica, s.n. 1952, p. 478                                              |
| 1111    | mare, quod stratum erat glacie firmissima ob. algorem hyemis                                                                                                                                                                                                                                                                                                                                                                                                                                                                                                                                                                                                                                                                                                                                                                                                                                                                                                                                                                                                                                                                                                                                                                                                                  | M. Hermanni Corneri, ordinis Praedicatorum chronica novella usque ad a. 1435 deducta, in: J.G. Eccardus, Corpus historiae medii aevi, v. 2, 1723, p. 654                            |
| 1118    | Parantem in Pomeranos Boleslaum Polonorum ducem expeditionem (iam siquidem intellexerat Swantopelkonem ducem, in cuius fidem Nakel castrum cum sex aliis opidis et municionibus commiserat, ad vacillationem temerato, quod sibi prestiterat iuramento, reversurum fore), imbres et pluvie tenuere. Dum enim veris tempore coepissent, etiam nec in aestate remittebant continuaque pluicione et descensu non solum Polonaie Regnum, sed et vicina regna atque provincias quampluris vexarunt incommodis, et inundatio sine exemplo in universa terra ex assiduis tempestatibus secuta et agros seri et sata meti in plerisque locis prohibuit. Ea tamen loca huiusmodi inundacione, quae fluvii maiores circumfluunt, aquis ultra solitum inflatis et ripas egredientibus fuere oppressa et afflicta. Eodem insuper anno post solis occasum caelum totum in tantam rubedinem versum est, ut velut ignis vel flamma tribus horis colluceret. Quae res in prodigium et admiracionem apud multos versa, magnum aliquem effectum productura tunc insinuavisse credita est. Nec multo post tanti imbres descenderunt in terram, tot coortae sunt pluvie et tempestates, tantaque denique crevit fluviorum inundacio, ut alterum cathaclysmum nonnulli pertimescerent proventurum. | Ioannis Dlugossii Annales seu Cronicae incliti Regni Poloniae, Lib 3-4, 1970, p., p. 284-5; Jan Długosz, Roczniki czyli kroniki sławnego Królestwa Polskiego, ks. 3-4, 2009, p. 347 |
| 1118    | Maxima inundatio aquarum in omni Europa fuit.                                                                                                                                                                                                                                                                                                                                                                                                                                                                                                                                                                                                                                                                                                                                                                                                                                                                                                                                                                                                                                                                                                                                                                                                                                 | Annalista Saxo, in: Monumenta Germaniae Historica, v. 6, p. 755                                                                                                                     |

|           |                                                                                                                                                                                                                                                                                                                                                                                                                                                                            |                                                                                                                                                                                        |
|-----------|----------------------------------------------------------------------------------------------------------------------------------------------------------------------------------------------------------------------------------------------------------------------------------------------------------------------------------------------------------------------------------------------------------------------------------------------------------------------------|----------------------------------------------------------------------------------------------------------------------------------------------------------------------------------------|
| 1118      | Eodem anno inundacio aquarum in omni terra                                                                                                                                                                                                                                                                                                                                                                                                                                 | Rocznik Traski, in: Monumenta Poloniae Historica, v. 2, p. 832                                                                                                                         |
| 1121      | Mensibus tribus et continuis, Marcio videlicet, Aprili et Mayo, validissima siccitas et estus terram pressit. Propter quam non estivales solum, sed et hiemales segetes extenuate et arefacte annum illum effecerunt apud Polonos annonae caritate turbidum et sterilem. Vicinae quoque regiones et provinciae eandem siccitatem et sterilitatem experte fame et inedia aliquanto tempore premebantur.                                                                     | Ioannis Dlugossii Annales seu Cronicae incliti Regni Poloniae, Lib 3-4, 1970, p., p. 294; Jan Długosz, Roczniki czyli kroniki sławnego Królestwa Polskiego, ks. 3-4, 2009, p. 357-358  |
| 1125      | Hiems seva et horrida, in qua multa pecora hominesque frigore magno periere, et quassatis frigore frugibus fames subsecuta est in regionibus Polonorum.                                                                                                                                                                                                                                                                                                                    | Ioannis Dlugossii Annales seu Cronicae incliti Regni Poloniae, Lib 3-4, 1970, p., p. 303; Jan Długosz, Roczniki czyli kroniki sławnego Królestwa Polskiego, ks. 3-4, 2009, p. 369      |
| 1125      | eodem anno inundacio aquarum maxima fuit                                                                                                                                                                                                                                                                                                                                                                                                                                   | Annales Ecclesiae Cracoviensis, in: Monumenta Poloniae Historica, s.n. v. 2, p. 797                                                                                                    |
| 1151-1152 | [...] medium Junium [...] et abhinc usque ad sequentem annum frequentes inundaciones pluviarum fuerunt                                                                                                                                                                                                                                                                                                                                                                     | H. Korner, Die Chronica des Korners, in: J. Schwalm, Die chronica novella der Hermann Korner, 1895, p. 588                                                                             |
| 1158      | Aquarum quoque inundatia infinitam hominum multitudinem cum pecoribus suis extinxit                                                                                                                                                                                                                                                                                                                                                                                        | Historiographia Alberti abbatis Stadensis, a condito orbe usque ad auctoris aetatem, 1608, p. 191                                                                                      |
| 1167      | [...] item et reliqua agmina, quibus Myeczslaus dux ceterique prefecti preerant, postremum deinde, quod Boleslaus monarcha cum exercitatissimis militibus servabat, in saltus primum et silvestres densaque solitudine rigentes recessus, deinde paludinibus limosique bituminis lubricitate perpetua obsitis, loca palustria, descensu insuper et congerie imbrium limosa et quae naturales voraginum abissos vernancia graminis superficietenus nati tegebant, inducunt. | Ioannis Dlugossii Annales seu Cronicae incliti Regni Poloniae, Lib 5-6 1973, p. 84; Jan Długosz, Roczniki czyli kroniki sławnego Królestwa Polskiego, ks. 5-6: 1140-1240, 2009, p. 105 |
| 1204      | Non valentes autem propter gelu, quod immensum erat, navim littori applicare, eam in glacie relinquunt, et per Daciam in Theuthoniam vadunt rebus suis secum assumptis.                                                                                                                                                                                                                                                                                                    | Heinrici chronicon Lyvoniae, in: Monumenta Germaniae Historica, v. 23, p. 249                                                                                                          |



|      |                                                                                                                                                                                                                                                                                                                                                                                                                                                                                                                                                                                                                                                                                                                                                                                                                                                                                                                                                                                                                                                                                                                                                                                                                                          |                                                                                                                                                                                             |
|------|------------------------------------------------------------------------------------------------------------------------------------------------------------------------------------------------------------------------------------------------------------------------------------------------------------------------------------------------------------------------------------------------------------------------------------------------------------------------------------------------------------------------------------------------------------------------------------------------------------------------------------------------------------------------------------------------------------------------------------------------------------------------------------------------------------------------------------------------------------------------------------------------------------------------------------------------------------------------------------------------------------------------------------------------------------------------------------------------------------------------------------------------------------------------------------------------------------------------------------------|---------------------------------------------------------------------------------------------------------------------------------------------------------------------------------------------|
| 1212 | In mense siquidem Iulio fulminis ictu errarium Cracouiensis ecclesiae de celo tactum est                                                                                                                                                                                                                                                                                                                                                                                                                                                                                                                                                                                                                                                                                                                                                                                                                                                                                                                                                                                                                                                                                                                                                 | Ioannis Dlugossii Annales seu Cronicae incliti Regni Poloniae, Lib 5-6 1973, p. 214; Jan Długosz, Roczniki czyli kroniki sławnego Królestwa Polskiego, ks. 5-6: 1140-1240, 2009, p. 267     |
| 1219 | W Polsce przez całe lato padał deszcz, który rzadko ustawał. Z powodu powodzi był głód; zima była bardzo ciężka.                                                                                                                                                                                                                                                                                                                                                                                                                                                                                                                                                                                                                                                                                                                                                                                                                                                                                                                                                                                                                                                                                                                         | Buczinskij I.E., O klimacie przeszłowo ruskój rawniny, 1957, p. 66                                                                                                                          |
| 1221 | Facta est erumpcio ymbrium et inundacio aquarum per trennium in Polonia                                                                                                                                                                                                                                                                                                                                                                                                                                                                                                                                                                                                                                                                                                                                                                                                                                                                                                                                                                                                                                                                                                                                                                  | Rocznik Traski, in: Monumenta Poloniae Historica, v. 2, p. 836                                                                                                                              |
| 1221 | A festo siquidem Paschae usque ad tempora autumpnalia pluviarum et imbrium continuus descensus tantam fluviorum inundacionem causavit, ut aquis supra modum crescentibus et inflatis quidam particularis cathaclismus terris timebatur accidisse. Undarum autem tam horrenda et insolita erupcio et plerasque villas in basso sitas demolicione perpetua absorbuit, vernalia frumenta seri prohibuit, et que terre per autumpnum inserta erant, voravit, preter loca pauca, quorum agros collium aut moncium altitudo a peste huiusmodi defenderat. Germania itaque frugum huiusmodi alluvione depasta, multis incommoditatibus non solum Poloniam, sed et omnes finitimas regiones, in quibus eque provenerant, vexavere; nam et domesticorum animalium, pabulis deficientibus, mors primum obvenit, deinde fames valida et spatio triennali continuata, eciam plurimos mortales aggrestes praecipue, victualium inedia tabescentes, adeo absumpsit, ut plures ville et opida habitatoribus consumptis vacuae desertaeque remanerent. Malum autem huiusmodi ex imbrium multiplicitate proveniens, hiems grandis et sine exemplo proveniens ingravavit sub quo eciam tempore peccorum et peccudum magna mortalitas pestisque secuta est. | Ioannis Dlugossii Annales seu Cronicae incliti Regni Poloniae, Lib 5-6 1973, p. 233; Jan Długosz, Roczniki czyli kroniki sławnego Królestwa Polskiego, ks. 5-6: 1140-1240, 2009, p. 290-291 |
| 1225 | Diese Fürsten alle mitt bruder Hermann Balke landtmeistern vnd 28 brüdern seines ordens mit hundert Knechten zogen mit vffgerichten fanen am tage Simonis Judae bei dem Vogelsange vber die Weissel, welche damals von der hefftigen kilde gefroren ware, [...]                                                                                                                                                                                                                                                                                                                                                                                                                                                                                                                                                                                                                                                                                                                                                                                                                                                                                                                                                                          | Die Heilsberger Chronik, [in:] Monumenta Historiae Warmiensis, ted. C.P. Woelky, . 8, 1889, p. 232                                                                                          |
| 1235 | Irrepsit et aliud malum, alique pernicies in Poloniae Regnum, que priorem ingeminavit. Frumentis siquidem tam estivalibus quam hiemalibus, tum per asperitatem hiemis tum per imbrium frequentem inundacionem consumptis                                                                                                                                                                                                                                                                                                                                                                                                                                                                                                                                                                                                                                                                                                                                                                                                                                                                                                                                                                                                                 | Ioannis Dlugossii Annales seu Cronicae incliti Regni Poloniae, Lib 5-6 1973, p. 273; Jan Długosz, Roczniki czyli kroniki sławnego                                                           |

|                                             |                                                                                                                                                                                                                                                                                                                                                                                                                                                                                                                                                                                                                                                                                                                                                                                                                           |                                                                                                                                                                                            |
|---------------------------------------------|---------------------------------------------------------------------------------------------------------------------------------------------------------------------------------------------------------------------------------------------------------------------------------------------------------------------------------------------------------------------------------------------------------------------------------------------------------------------------------------------------------------------------------------------------------------------------------------------------------------------------------------------------------------------------------------------------------------------------------------------------------------------------------------------------------------------------|--------------------------------------------------------------------------------------------------------------------------------------------------------------------------------------------|
|                                             | ingens fames universam Poloniam longo tempore oppressit [...]                                                                                                                                                                                                                                                                                                                                                                                                                                                                                                                                                                                                                                                                                                                                                             | Królestwa Polskiego, ks. 5-6: 1140-1240, 2009, p. 342                                                                                                                                      |
| 1253, 20<br>April-25<br>July, 1<br>November | Rubrica de tempore pluviali. Eodem itaque anno a festo Paschalis usque ad festum sancti Jacobi tempore messis nocte dieque pluivit incessanter et tanta fuit inundatio aquarum facta, quod per agros et vias homines navigabant et cum segetes metebantur, querebantur monticuli ad fruges repondendas. Inveniebantur etiam pisces per agros in sulcis, in gulgustribus prendebantur. Et extunc terra Wyszniensis tum ex infestacione paganorum, tum ex multitudine ymbrium fuit desolata. Et post hoc in festo Omnium Sanctorum post miassam maiorem [...] audita sunt sexies tonitrua mugire.                                                                                                                                                                                                                           | Chronica Poloniae Maioris, [in:] Monumenta Poloniae Historica, ed. B. Kürbis, s.n., t. 8, 1970, s. 100                                                                                     |
| 1253                                        | Annus hic apud Polonos insignis et beatissimi martiris Stanislai Cracoviensis episcopi, que septuaginta quinque et centum annis neglecta erat, canonicacione, et duorum sub uno tempore, Poznaniensis videlicet et Plocensis, pontificum morte et nunquam alias apud Polonos visa alluvione. Nocte siquidem et interdium, a festo Pasche usque ad diem vicesimam quintam Iulii, celo imbres et continuas effundente in Polonorum regionibus pluvias, tanta aquarum moles et inundacio erupit, ut in quibuslibet bassis et humilibus locis, aut amnibus proximis, frumenta cooperiret, et agri atque campi iuxta atque amnes navigabiles forent; querebantur editiora loca que frumenta collecta susciperent. Ea quoque inundacione et Litwanorum infestacione Viszensis terra in solitudinem et desolacionem redacta est. | Ioannis Długossii Annales seu Cronicae incliti Regni Poloniae, Lib 7-8 1975, p. 95; Jan Długosz, Roczniki czyli kroniki sławnego Królestwa Polskiego, ks. 7-8: 1241-1299, 2009, p. 117-118 |
| 1253                                        | W Krakowie była duża powódź, ponieważ przez całe lato padały bez przerwy deszcze i woda zalała wszystkie zasiewy na polach.                                                                                                                                                                                                                                                                                                                                                                                                                                                                                                                                                                                                                                                                                               | Buczinskij I.E., O klimacie przeszłowo ruskij rawniny, 1957, p. 24                                                                                                                         |
| 1259, after<br>30<br>November               | Qui dum Wislam et ceteros fluvios gelida hieme et glaciebus induratis facile transissent, subito Sandomiriam perveniunt [...]                                                                                                                                                                                                                                                                                                                                                                                                                                                                                                                                                                                                                                                                                             | Ioannis Długossii Annales seu Cronicae incliti Regni Poloniae, Lib 7-8 1975, p. 124; Jan Długosz, Roczniki czyli kroniki sławnego Królestwa Polskiego, ks. 7-8: 1140-1240, 2009, p. 156    |
| 1269                                        | Na Śląsku, między Nysą a Odrą, przez trzy dni padał krwawy deszcz. Również przez całe lato padały silne deszcze i woda zalała wszystkie zasiewy, i nie tylko zasiewy, lecz również młody przychówek, wskutek czego powstała drożyzna.                                                                                                                                                                                                                                                                                                                                                                                                                                                                                                                                                                                     | Buczinskij I.E., O klimacie przeszłowo ruskij rawniny, 1957, p. 67                                                                                                                         |
| 1269                                        | Wandalus fluvius subito inundavit.                                                                                                                                                                                                                                                                                                                                                                                                                                                                                                                                                                                                                                                                                                                                                                                        | Annales Polonaie Maioris II, [in:] Monumenta Poloniae Historica, t. 3, p. 170                                                                                                              |

|                            |                                                                                                                                                                                                                                                                                                                                                                                                                                                                                                                                                                                                                                                                                                                                                                                                                                                             |                                                                                                                                                                                           |
|----------------------------|-------------------------------------------------------------------------------------------------------------------------------------------------------------------------------------------------------------------------------------------------------------------------------------------------------------------------------------------------------------------------------------------------------------------------------------------------------------------------------------------------------------------------------------------------------------------------------------------------------------------------------------------------------------------------------------------------------------------------------------------------------------------------------------------------------------------------------------------------------------|-------------------------------------------------------------------------------------------------------------------------------------------------------------------------------------------|
| 1270                       | Nec prodigiis tantummodo, sed et tempestatibus et diluviis annus hic apud Polonos insignis fuit. A vicessima siquidem et secunda die Iunii usque prope dimidium Augusti continuos nocte et interdium celo fundente imbres, adeo inflati aquis fluvii ripas excesserant, ut non solum segetes, agros, prata et campos, sed etiam villarum fastigia operirent. Wisla insuper fluvius in tantum excesserat, ut universum spacium inter montem Lyaszothinum et ecclesiam sancti Stanislai de Rupella positum occuparet rabidoque suo cursu et homines et domos plures, peccora, pecudes, iumenta et queque reptilia molendinaque absorbendo, vomeret et agris silvisque induceret exterminium aut orbitatem, non agros solum, sed et villas culminaque earum et villarum incolas sorbens et demersos tunc agros ad longa tempora steriles et inutiles efficiens | Ioannis Dlugossii Annales seu Cronicae incliti Regni Poloniae, Lib 7-8 1975, p. 166-7; Jan Długosz, Roczniki czyli kroniki sławnego Królestwa Polskiego, ks. 7-8: 1241-1299, 2009, p. 211 |
| 1270, ca. 21 July          | Ipsa anno fluvius qui dicitur Niza fluxit sanguine tribus diebus, id est a feria sexta usque ad diem dominicum. Circa idem tempus fluvius Odra fluxit tribus diebus ita, quod color eius aque fuit viridissimus, postea aliis tribus diebus tota aqua sanguinea. Iterum circa festum beatae Marie Magdalene tribus diebus fuit maxima inundatio aquarum in Cracovia per Wyslan, qualis nunquam visa fuit, quia occupavit villas, segetes, prata et totum campum et spacium a monte sancti Stanislai usque ad montem sancti Benedicti, et multos homines submersit et domos et molendina, et duravit hoc malum per 15 dies, et hoc diluvium per diversas provincias mundi, et fecit Raba et Dunaiecz [...] Eodem anno in terra Zlesie circa Michalow pluit de celo sanguis - erat autem tempus estivum et maximus fervor illo die.                           | Annales Trascaee, [in:] Monumenta Poloniae Historica, v. 2, p. 841                                                                                                                        |
| 1270, 21 August            | 12 Kalendae Augusti, fuit inaudita inundatio fluviorum, precipue Wisle, Rabe et Dunaiech. Verum quanta dampna fecerit horror est referre. Namque sua torrenti violencia in utraque parte littorum et riparum longe lateque villas agrosque miserabiliter abolevit. Homines, iumenta ceteraque animalia in parte maxima submergendo.                                                                                                                                                                                                                                                                                                                                                                                                                                                                                                                         | Annales Polonorum, [in:] Monumenta Germaniae Historica, Scriptores, v. 19, p. 604                                                                                                         |
| 1276, 6 October            | In octava sancti Michaelis cecidit in Cracovia in magna copia nix.                                                                                                                                                                                                                                                                                                                                                                                                                                                                                                                                                                                                                                                                                                                                                                                          | Annales Trascaee, [in:] Monumenta Poloniae Historica, v. 2, p. 843                                                                                                                        |
| 1276, September, 6 October | Hiems insueta tempore insolito Cracoviae. Frigore immenso et sine exemplo Cracoviensem provinciam in fine Septembris mensis premente, sexta deinde Octobris die tanta nivium congeries descendit, Alpibus, Sarmaticis, qui Poloniam et Hungariam dividunt, et aliis, quos Thatri appellamus ad Keszmark sitis insolitum celi rigorem augmentibus, ut omnem regionem spissitudine grossa vestiret et pro autumno gelidam hiemem induceret. Kiedy pod                                                                                                                                                                                                                                                                                                                                                                                                         | Ioannis Dlugossii Annales seu Cronicae incliti Regni Poloniae, Lib 7-8 1975, p. 192; Jan Długosz, Roczniki czyli kroniki sławnego Królestwa Polskiego, ks. 7-8: 1241-1299, 2009, p. 211   |

|                      |                                                                                                                                                                                                                                                                                                                                                                                    |                                                                                                                                                                        |
|----------------------|------------------------------------------------------------------------------------------------------------------------------------------------------------------------------------------------------------------------------------------------------------------------------------------------------------------------------------------------------------------------------------|------------------------------------------------------------------------------------------------------------------------------------------------------------------------|
|                      | koniec września ścisnął okolicę Krakowa ostry, niespotykany mróz, potem szóstego października spadła tak wielka ilość śniegu, że w Alpach Sarmackich oddzielających Polskę od Węgier iw innych górach - które nazywamy Tatrami - położonych koło Kieżmarku i potęgających niezwykłą surowość klimatu, pokryła całą okolicę grubąpowłoką i zamiast jesieni sprowadziła mroźną zimę. |                                                                                                                                                                        |
| 1278                 | Cum ergo eo anno esset hyems magis aspera solito [...]                                                                                                                                                                                                                                                                                                                             | Annales Trascae, [in:] Monumenta Poloniae Histoirca, v. 2, p. 844                                                                                                      |
| 1281                 | [...] et inundacio aquarum fuit per totum fere mundum                                                                                                                                                                                                                                                                                                                              | Annales Polonorum, [in:] Monumenta Germaniae Histoircia, Scriptores, v. 19, p. 646, 647                                                                                |
| 1283                 | Ci, którzy wyjeżdżali z miasta [Lwowa], umierali z powodu mrozu w drodze, bo zima była bardzo mroźna. W tym roku zmarła w miastach niezliczona liczba osób, inne umierały we wsiach. Tej zimy panowała w Polsce silna zaraza morowa [...] Miały miejsce silne burze i błyskawice, i okropne wiatry z wichurą.                                                                      | Buczinskij I.E., O klimacie przeszłowo ruskowej rawniny, 1957, p. 68                                                                                                   |
| 1285/86              | Mare balticum nimio gelu contrigitur.                                                                                                                                                                                                                                                                                                                                              | Petri Olai Minoritae Roskildensis chronica regum Danicarum a Dano ad obitum Johannis regis, [in:] Scriptores rerum Danicarum medii aevi, ed. J. Langebek, 1772, p. 188 |
| 1300                 | Eodem anno tempestas fuit magna                                                                                                                                                                                                                                                                                                                                                    | Annales Polonaie Minoris II, [in:] Monumenta Poloniae Historica, t. 3, p. 186                                                                                          |
| 1303                 | Anno Domini 1303 habita fuit eyms estivalis, quod homines nullum frigus senserunt.                                                                                                                                                                                                                                                                                                 | Rocznik wrocławski dawny i rocznik magistratu wrocławskiego, ed. A Bielowski, [in:] Monumenta Polonaie Historica, v. 3, 1878, p. 684                                   |
| 1304, ca. 1 November | Item jm jare 1304 vmme alle gades hilligenn, weyede so einn groth stormwindt, nicht gehortt bi minschenn thiden, bome wth der erdenn, dorpe, molen vmme, vnnd makede so groth water vmme ditt landt, dat datt Nyedep vthbrack; vnnd dar de van Cikere plegenn eren weitenn tho seyen vp denn Rudenn vnnd thogande van dem einenn lande vp datt ander, dat wass water.              | Johann Berckmanns Stralsundische Chronik und die noch vorhandenen Auszüge aus alten verlorengangenen Stralsundischen Chroniken, [in:] Stralsunder Chronikon,           |

|                      |                                                                                                                                                                                                                                                                                                                                                      |                                                                                                                                         |
|----------------------|------------------------------------------------------------------------------------------------------------------------------------------------------------------------------------------------------------------------------------------------------------------------------------------------------------------------------------------------------|-----------------------------------------------------------------------------------------------------------------------------------------|
|                      | Item anno 1300 vnnd 4 iss dat Nyedep vor dem Sunde vth middell eines stormes gekamenn.                                                                                                                                                                                                                                                               | ed. G.C.E. Mohnicke, E.H. Zober, 1933, p. 4                                                                                             |
| 1304, ca. 1 November | Facta est tempestas maxima in mari, per quam multe domus ecclesie et turres prostrate sunt et naves plurime confracte et submerse. Et in eodem nocte factus est novus portus apud Rugiam, quae vocatur das neue tieff                                                                                                                                | Des Thomas Kantzow Chronik von Pommern in niederdeutschen Mundart, ed. G. Gaebel, 1929, p. 224                                          |
| 1306                 | Tanta in Germania et Gallia frigora fuerunt, quanta in Norvegia solito maiora sunt. Tunc quidam de Rostochio in Daniam per fretum Codanum [super glacie] ambularunt.                                                                                                                                                                                 | Annales Islandorum Regii, [in:] Scriptores rerum Danicarum, p. 127                                                                      |
| 1306                 | fuit hyems maxima ita quod mare inter Olandiamet Gutlandiam et Estoniam extitit congelatum [...]                                                                                                                                                                                                                                                     | Diarium Fratrum Minorum Wisbyensium, [in:] Scriptores rerum Suecicarum, v. 1, ed. E.M. Fant, 1818, p. 33                                |
| 1306                 | Tanta fuit hyemps, quod inyer omnes terras et insulas Dacie et Svecie omnes pontus per XIV septimanas et ultra quasi in solidos pontes conversi sunt.                                                                                                                                                                                                | Nicolai archiepiscopi Lundensis chronica episcoparue Lundensium (1104-1497), [in:] Scriptores rerum Danicarum, medii aevi, v. 6, p. 628 |
| 1306 [1305?]         | Eodem anno arsit circa ecclesiam omnium sanctorum; de illo igne ventus portavit super ecclesiam cathedralem et exussit totam et castrum , quam ecclesiam [...]                                                                                                                                                                                       | Rocznik Małopolski, [in:] Monumenta Polonaie Historica, v. 3, 1878, p. 188                                                              |
| 1310                 | Sterilitas anni et fames propter inundationem aquarum. Eo anno in Italia, Polonia, Bohemia et Almannia, maximis tempestatibus coortis, tanta inundacio subsequuta est, ut multa opida, ville et rura simul cum hominibus et peccoribus perpetua alluvione absorberentur. Sol quoque ultima Ianuarii passus est eclipsim;                             | Ioannis Dlugossii Annales seu Cronicae incliti Regni Poloniae, Lib 9, 1978, p. 65                                                       |
| 1310, 25 July        | in die beati Jacobi apostoli mane incepit pluere; et duravit continue illa pluvia per duos dies et noctes, per quam aqua, que Niza vocatur, tam inundavit, quod ante civitatem Glatz multas domos subruit et deduxit, et mille quingentos homines, ut dicunt, ibidem submersit, exceptis aliis locis, ubi eciam plurimi perierunt.                   | Annales Cistercienses in Heinrichow, [in:] Monumenta Germaniae Histoirca, v. 19, p. 545                                                 |
| 1310, 25 July        | Anno Domini 1310 in die beati Iacobi aopstoli circa horam primam incepit pluere, et duravit illa pluvia per duos dies et noctes, ey qua pluvia fluvius, que Niza vocatur, tantum inundavit, quod civitatem, que Glatz vocatur, multas domos subruit et mille quingentoas homines ibidem submersit, exceptis allis locis, ubi eciam plurimi perierunt | Annales Cistercienses Henricoviensium, [in:] Monumenta Poloniae Histoirca, v. 3, 702-703                                                |
| 1310, 26 July        | Den andern tak czu Cladcze dertrenckte es die gancze vorstat, also das da dertruncken wol pey czwey tausent menschen. Man sach vil wilder tir auff den cloczem flissen,                                                                                                                                                                              | Die pehemische Cronica dewcz, [in:] Fontes rerum                                                                                        |

|                         |                                                                                                                                                                                                                                                                                                                                                                                                                                                                                                                                                                                                   |                                                                                                                                                                                           |
|-------------------------|---------------------------------------------------------------------------------------------------------------------------------------------------------------------------------------------------------------------------------------------------------------------------------------------------------------------------------------------------------------------------------------------------------------------------------------------------------------------------------------------------------------------------------------------------------------------------------------------------|-------------------------------------------------------------------------------------------------------------------------------------------------------------------------------------------|
|                         | gancze hewser mit leuten, vnd wigen mit lebenden kindern, also das das wasser grossen schaden tate vnd vil dorfer vnd leute dertrenckte                                                                                                                                                                                                                                                                                                                                                                                                                                                           | Bohemicarum, 3, 1882, p. 295                                                                                                                                                              |
| 1312                    | Wisla maxime inundavit                                                                                                                                                                                                                                                                                                                                                                                                                                                                                                                                                                            | Annales Polonaie Minoris II, [in:] Monumenta Poloniae Historica, t. 3, p. 171                                                                                                             |
| 1315                    | Bellis externis et commotionibus domestici paulisper in Regno Poloniae sedatis, fames omni bello atrocior Poloniae regiones invasit. Dum etenim, nivibus ultra solitum terram occupantibus, veris dies supervenissent, fruges terrae mandatae, a calore vernali paludamento nivis opertae, depastae extinctaeque. Ex qua coeli inclementia, contagio famis ad universos perveniens, plures ex agrestibus afflixit, plures atrocitate sua confecit                                                                                                                                                 | Ioannis Dlugossii Annales seu Cronicae incliti Regni Poloniae, Lib 9, 1978, p.                                                                                                            |
| 1316                    | Praecessit eodem Anno Nissi inundatio, qua Gorlicii S. Spiritus nosocomium perrupit, pontem urbis et multos alios convulsos abripuit, moletrinis omnibus et aedificiis flumini propinquis multum nocuit: in plateam usque Nissensem pertigit.                                                                                                                                                                                                                                                                                                                                                     | Mart. Meisterus, Annales Gorlicensis, v. 1, pars 2, p. 8; Carpzw J.B. Analecta Fastorum Zittaviensium etc. Zittau 1716, p. 262                                                            |
| 1316                    | Eodem anno fuerunt multe tempestates et inundacia aquarum tam in estate quam in yeme sive autumpno.                                                                                                                                                                                                                                                                                                                                                                                                                                                                                               | Canonici Sambiensis Annales (1338) [in:] Monumenta Germaniae Historica, Scriptores, v. 19, p. 706                                                                                         |
| 1316                    | Estat namque tempore contra naturam huius temporis facta est ex continuatis imbribus tam copiosa aquarum habundancia, quod more diluvia in loci pluribus subverteret edificia, muros et castra. In partibus Saxonie tantum Albea fluvius excrevit, quod quadringentas et quinquaginta villas aque vicinas cum hominibus et pecoribus partier delevit. In Austria, Polonia, Vngaria et Mysna de hoc Diluvio omnium hominum querimonia nunciabat infinita pericula esse facta. Hec aquarum inundacio campos et valles cooperuit, fenum et segestes destruxit, summumque plura, que rapuit, deduxit. | Chronicon aulae regiae (1338), [in:] Fontes rerum Bohemicarum, Iva, 1884, p. 232; Chronicon Francisci Pragensis (1353), [in:] Fontes rerum Bohemicarum, I – IV, 1874 – 1884, v. 4, s. 383 |
| 1318, 12 December       | 11 Kal. Ianuarii, id est in crastino beati Thome apostoli, circa horam vesperarum ventus vehemens venit, qui cum tanto inpetu nivem spargebat et circumferebat, quod homines, qui in viis et in campis erant, quasi excecati per nivem, ad sua hospitia redire non potuerunt et sic plures frigore perierunt.                                                                                                                                                                                                                                                                                     | Rocznik cystersów henrykowskich, [in:] Monumenta Poloniae Historica, v. 3, p. 703                                                                                                         |
| 1320, November-Dezember | In nocte beati Nicholai magna fuit temestas et aquarum inundation. Nam aqua in poru Travenae a solito statu crevisse dicebatur in altitudinem 7 cubitorum. Propter quos in Lubeke et in aliis locis et civitatibus maritimis in Slavia et alibi multa bona et similiter homines perierunt. Qua                                                                                                                                                                                                                                                                                                    | Annales Lubicensis (1264 – 1324), [in:] Monumenta Germaniae Historica, Scriptores, v. 16, p. 428                                                                                          |

|                                |                                                                                                                                                                                                                                                                                                                                                                                                             |                                                                                                                                                                                                                                                  |
|--------------------------------|-------------------------------------------------------------------------------------------------------------------------------------------------------------------------------------------------------------------------------------------------------------------------------------------------------------------------------------------------------------------------------------------------------------|--------------------------------------------------------------------------------------------------------------------------------------------------------------------------------------------------------------------------------------------------|
|                                | inundation transacta, infra quindenam sequentem supervenit alia quaedam inundatio modico prima remissior.                                                                                                                                                                                                                                                                                                   |                                                                                                                                                                                                                                                  |
| 1320,<br>November-<br>Dezember | Maxima inundacia quarum ascendit in partibus astagnalibus secundum cronicam Obotritorum. Nam in urbe Lubicana flumen Trabena cooperuit pontem illum altum, per quem de civitate itur in terram Holtzatorum, et deiecit ipsum in magna parte. Multi eciam homines et iumenta innumera perierunt in domibus et stratis prope Trabenam situates et bona mercatorum plura in casis et cellariis sunt exinanita. | H. Korner H., Chronica novella de quarto opere bis 1435 – Lünebürger Handschrift und Chronica novella de secundo opera bis 1423 – Linköpinger Handschrift (1201 – 1435), [in:] J. Schwalm. Die chronica novella der Hermann Korner, 1895, p. 229 |
| 1320,<br>November-<br>Dezember | Tanta inundacio aquarum facta est in partibus maritimis, quod Trabena parva aqua pontem, quo itur versus Holtzaciam, in civitate Lubicensi transcenderet ad mensuram ulne unius. Ex qua inundacione plures perierunt homines et iumenta secundum cronicas Lubicensium.                                                                                                                                      | H. Korner, Chronica novella de quarto opere bis 1435 – Lünebürger Handschrift und Chronica novella de secundo opera bis 1423 – Linköpinger Handschrift (1201 – 1435), w [in:] J. Schwalm. Die chronica novella der Hermann Korner, 1895, p. 229  |
| 1320,<br>November-<br>Dezember | In sunte Nicolaus daghe was de Travene so grot van upwater van der se, dat de Travene stot uppe dem damme anderthalve elen ho, unde warde twe daghe unde twe nacht.                                                                                                                                                                                                                                         | Aufzeichnungen eines Unbekannten vom Jahre 1320, [in:] Die Chroniken der deutschen Städte, v. 26, 1899, p. 336                                                                                                                                   |
| 1320,<br>November-<br>Dezember | tho sunte Andreas dage do wart in den steden bi der Ostersee so grot storm [...] sodder worden tho Lubeck de huse bi der Traven und de straten seer gehoget                                                                                                                                                                                                                                                 | Aufzug aus des Stades-Chronik, Fragment von 1315-1349, [in:] Die Chroniken der deutschen Städte, v. 26, p. 281; Der sogenannten Rufus-Chronik, I. t. von 1105-1395, , [in:] Die Chroniken der deutschen Städte, v. 26, p. 231                    |
| 1322, 1332?                    | Ipsa anno talis estus fuit, ut homines vetuli dixerunt nunquam se diebus suis in terra Cracoviae talem estum fuisse expertos, unde ad magne indicium siccitas Wandalus fluvius in tantum decrevit, ut decennis et duodecennis pueris in pluribus locis viabilis et vadabilis esset.                                                                                                                         | Annales Polonaie Minoris II, [in:] Monumenta Poloniae Historica, t. 3, p. 195-196                                                                                                                                                                |
| 1322/23                        | Inter Norwegiam etiam, Angliam et Flandriam multae naves in medio maris congelatae fuerunt in glacie, ita quod mercatores ex navibus se mutuo visitabant, eundo per glaciem, pro solatiis habendis                                                                                                                                                                                                          | Annales Lubicenses (1264-1324), [in:] Monumenta Germaniae Historica, Scriptores, v. 16, p. 428-429                                                                                                                                               |

|                      |                                                                                                                                                                                                                                                                                                                                                                                      |                                                                                                                                                     |
|----------------------|--------------------------------------------------------------------------------------------------------------------------------------------------------------------------------------------------------------------------------------------------------------------------------------------------------------------------------------------------------------------------------------|-----------------------------------------------------------------------------------------------------------------------------------------------------|
| 1322/23              | Fuit enim inter Daciam et Slaviam et Imbriam totum mare Balticum congelatum, ita quod latrones, de Slavia intrantes, quasdam partes Daciae deprædarunt, et tabernæ in medio maris in glaciæ pro transeuntibus factæ fuerunt.                                                                                                                                                         | Annales Lubicensis (1264-1324), [in:] Monumenta Germaniæ Historica, Scriptores, v. 16, p. 428                                                       |
| 1322/23              | des winters bi sunte Andreas daghe stunt an grot vrost unde warede to midvasten, de schepe bevroren in der zee midweghe tuschen deme Swene unde Norweghen; [...] in der Osterze wuste nement jeneghe sunde eder wathern, se ne weren mit yse hart beleghet                                                                                                                           | Dettmar Chronik von 1101-1395 und Fortsetzung von 1395-1400, [in:] Die Chroniken der deutschen Städte, v. 19, p. 443                                |
| 1322/23              | yss so grot wynter gewest, dat men van Reuel yn Dennemarcken vnd wedder auer ynt lant to Mekelenborch vnd Pameren heft myt perden ryden vnd gan konnen auer iss                                                                                                                                                                                                                      | Hamburger Chronik vom Jahre 799 bis 1559, [in:] Hamburgische Chroniken in niederdeutscher Sprache, ed. J.M. Lappenberg, 1861, p. 396                |
| 1322                 | Hyems erat tam saeva, ut homines super maria equitarent                                                                                                                                                                                                                                                                                                                              | Chronologia rerum memorabilium ab a. 1020 usque ad a. s rerum Danicarum, v. 2, p. 528                                                               |
| 1322/23              | Uppe de tiid van sunte Andreas dage wente to midvasten vros id so sere, dat de koplude mit waghene voreden ere gut ute Norweghen wente in dat Swen unde wedder umme, unde uppe der see weren tavernen unde krughe buwet, dar se ere beer selleden unde ere spise. Ok voren de koplude do sulven van der see steden in Prutzen unde in Liflande unde dar weren ok tavernen uppe maket | H. Korner, Die chronica novella ... , Deutsche Bearbeitung bis 1438, [in:] J. Schwalm. Die chronica novella der Hermann Korner, 1895, p. 542        |
| 1330                 | Rex Wladislaus [...] venit tempore autumnali usque ad fluvium Drawoczam [...] ubi vada erant [...] fluvium transivit [...] fertilitas [...] in Polonia                                                                                                                                                                                                                               | Rocznik Traski, [in:] Monumenta Poloniae Historica, v. 2, p. 854; Annales Polonaie Minoris II, [in:] Monumenta Poloniae Historica, t. 3, p. 190f.   |
| 1332, before 24 June | Ipsa anno talis estus fuit, ut homines vetuli dixerunt nunquam se diebus suis in terra Cracoviae talem estum fuisse expertos, unde ad magne indicium siccitas Wandalus fluvius in tantum decrevit, ut decennis et duodecennis pueris in pluribus locis viabilis                                                                                                                      | Annales Polonaie Minoris II, [in:] Monumenta Poloniae Historica, t. 3, p. 195-196; Rocznik Traski, [in:] Monumenta Polonaie Historica, v. 2, p. 857 |
| 1332                 | Siccitas maxima et aestus solis in Polonia. Ingens adeo solis ardor estusque in Polonie regionibus eo anno provenerat, ut ante festum beati Iohannis Baptiste fruges debitam maturitatem nocte ad quemlibet usum apte forent et undis desiccatis, alveos suos flumina desererent et tam fervida                                                                                      | Ioannis Dlugossii Annales seu Cronicae incliti Regni Poloniae, Lib 9, 1978, p. 176-177                                                              |



|                         |                                                                                                                                                                                                                                                                                                                                                                                                                                                                                |                                                                                                                                                                               |
|-------------------------|--------------------------------------------------------------------------------------------------------------------------------------------------------------------------------------------------------------------------------------------------------------------------------------------------------------------------------------------------------------------------------------------------------------------------------------------------------------------------------|-------------------------------------------------------------------------------------------------------------------------------------------------------------------------------|
|                         | ignitaque siccitas aput homines veteranos sine exemplo accidens prodigii monstrique haberetur loco.                                                                                                                                                                                                                                                                                                                                                                            |                                                                                                                                                                               |
| 1333, 23 April-28 April | nix magna fuit in Polonia circa festum sancti Adalberti et duravit quinque diebus                                                                                                                                                                                                                                                                                                                                                                                              | Notae Gnesnenses, XI-XIV saec., [in:] Monumetna Polonaie Historica, v. 3, p. 45; Spominiki gnieźnieńskie, [in:] Monumenta Poloniae Histoirca, s.n., v. 6, ed. B. Kürbis, 1962 |
| 1333, 6 Mai             | Die Iohannis ante portam Latinam magna nix cecidit et ros super gramen versus est in glaciem.                                                                                                                                                                                                                                                                                                                                                                                  | Rocznik miechowski, [w:] Monumenta Poloniae Historica, t. 2, p. 884                                                                                                           |
| 1334                    | Nix grandis in die sancti Adalberti cadens, induxit magnam in frugibus fertilitatem. In die sancti Adalberti ingenti mole nix cum gelu in Regno Polonie descendens, cum quinque diebus durasset, pavoremque grandem, ne per illam fruges depasci absumique contingeret, in estimacione hominum, presertim agrestium, produxisset, tandem quinta die dissoluta, prestiti humo et frugibus suo imbre et irroracione insolitam fecunditatem qualem nec stercorisacio contulisset. | Ioannis Dlugossii Annales seu Cronicae incliti Regni Poloniae, Lib 9, 1978, p. 183                                                                                            |
| 1335, 28-29 October     | Anno Domini MCCCXXXV magnus ventus fuit. Crastina lux Symonis prostravit turbine lucos.                                                                                                                                                                                                                                                                                                                                                                                        | Notae Gnesnenses, XI-XIV saec., [in:] Monumetna Polonaie Historica, v. 3, p. 97.                                                                                              |
| 1337                    | Wysla inundatur.                                                                                                                                                                                                                                                                                                                                                                                                                                                               | Annales Polonaie Minoris II, [in:] Monumenta Poloniae Historica, t. 3, p. 199                                                                                                 |
| 1337                    | [...] dampnum, quod factum fuit in minori insula per Wislam: cum per impetum et inundationem transcederat et rupit aggerem in parte illa, que ad monasterium pertinebat                                                                                                                                                                                                                                                                                                        | Chronica Olivensis, [w:] Monumenta Poloniae Histoirca, t. 6, p. 335                                                                                                           |
| 1339/40                 | Forti exercitu Theodoricus de Aldemborg magister Prussie congregato, habens in suo comitatu comitem pallatinum Reni et Almanos, Lithuaniam hieme ingressus castrum Wyelunya obsidione cingit multiplicique infestacione impugnat. Verum cum omnes suos conatus recidere videret in irritum, quippe et locus egregie a natura munitus etiam probe a barbaris tutabatur, frigore etiam gelidissimo premente exercitum, redire Prussiam coactus est.                              | Ioannis Dlugossii Annales seu Cronicae incliti Regni Poloniae, Lib 9, 1978, p. 214.                                                                                           |
| 1345                    | In kalendis Marcii mensis magister Henricus Dusemer Cruciferorum de Prussia, habens in suo comitatu Hungarie et Bohemie milites, item marchionem Holandie et nonnullos ex Almannia comites et nobiles in Lithwanos et eorum terras expeditionem agit. Et licet exercitum haberet                                                                                                                                                                                               | Ioannis Dlugossii Annales seu Cronicae incliti Regni Poloniae, Lib 9, 1978, p. 237-8                                                                                          |

|                                    |                                                                                                                                                                                                                                                                                                                                                                                                                                                                                                                                                                                                                                |                                                                                                                                   |
|------------------------------------|--------------------------------------------------------------------------------------------------------------------------------------------------------------------------------------------------------------------------------------------------------------------------------------------------------------------------------------------------------------------------------------------------------------------------------------------------------------------------------------------------------------------------------------------------------------------------------------------------------------------------------|-----------------------------------------------------------------------------------------------------------------------------------|
|                                    | fortem et frequentem ac omnium victualium et necessariorum abundantia refertum, parva tamen vastacione terre Lithwanie, Lithwanis in castris et nemoribus delitescens, perfunctus, de Lithwania excedere propter glacierum dissolutionem et terre lubricitatem ac in Prussiam redire, nullo edito memorabili facto, coactus est.                                                                                                                                                                                                                                                                                               |                                                                                                                                   |
| 1346                               | Premislaus Otokarus venit in Thorun [...] propter adversitatem temporis et hiemis immansuetam [...] retro domus est reversus                                                                                                                                                                                                                                                                                                                                                                                                                                                                                                   | Spominki władysławskie (włocławskie), [in:] Monumenta Poloniae Historica, v. 2, p. 945                                            |
| 1347, 21<br>September              | Anno domini 1347, octavo ante divi Michaelis festum die, cecidit nix adeo multa, ut mole sua, cum arboribus superiaceret, ramos fregerit, cui mox deinde nimia superveniens pluvia tantam fecit aquarum inundatiam, ut homines super domorum tabulata aliquot diebus coacti fuerint habitare.                                                                                                                                                                                                                                                                                                                                  | Johannes Berghagens Pomerania, ed. O. Heinemann, [in:] Quellen zur Pommerschen Geschichte, v. 4, 1900, p. 163                     |
| 1347,<br>September                 | Anno 1347 acht dage vor Michaelis is gefallen so grot schnee, dat hir tho Stralsund - sonderlick dewile hier an dem drüdden dage darna en grot regen fill - solk ene flot thowegg gebracht ist, dat an etlicken orden sick de lüde up den bömen und böhnen erholden möten. Ock geschach tho dersuluen tidt wegen des velen waters grot schaden an dem vehe dat thom dele vordrank, thom dele vorfror.                                                                                                                                                                                                                          | Auszüge aus Stralsunder Chroniken von Jahre 1230-1521, [in:] Stralsunder Chronikon, ed. G.C.E. Mohnicke, E.H. Zober, 1933, p. 162 |
| 1347, 7<br>March, 27<br>Mai-2 June | Feria quarta post dominicam Oculi domus Miechoviensis vix consumata per ventum deiecta et contrita fuit. Eodem anno intra octavam corporis Christi alia domus in eodem loco constructa per ventum similiter est conminuta [...]                                                                                                                                                                                                                                                                                                                                                                                                | Rocznik miechowski, [w:] Monumenta Poloniae Historica, t. 2, p. 884                                                               |
| 1351, Mai                          | Grosse Bober-Uberschwemmung und Schaden                                                                                                                                                                                                                                                                                                                                                                                                                                                                                                                                                                                        | J.G. Bergemann, Chronik der Stadt Bunzlau, v. 2, p. 19                                                                            |
| 1351, Mai                          | Grosse Queis-Uberschwemmung, drei Hauser fortgerissen                                                                                                                                                                                                                                                                                                                                                                                                                                                                                                                                                                          | J.G. Bergemann, Beschreibung und Geschichte der Stadt Friedeberg a. Queis, 1829, p. 54                                            |
| 1353                               | Nix valida in Polonia circa finem mensis Maii decidens magnam frugum fertilitatem effecit. Evenit in Polonie Regno anno eodem sabbato in vigilia Penthecostes prodigiosum et nunquam antea visum ac sine omni exemplo portentum. Nam dum mensis Marcius, Aprilis et maior pars Maii calida, mansueta et apta tempora edidissent frugesque solis et temporis suavitate in culmos et aristassuccevisent, in uberem frugem perventure, subito frigoribus immensis coortis, gelu terram vehementer premebat. Quo aliquantulum restricto nix valida et immensa, duorum cubitorum altitudinem faciens, insperate et subito descendit | Ioannis Dlugossii Annales seu Cronicae incliti Regni Poloniae, Lib 9, 1978, p. 269                                                |

|               |                                                                                                                                                                                                                                                                                                                                                                                                                                                                                                                                                                                                                                                                                                                                                                                                                                                                                                                                                                                                                                                                                                                                                                                                                                                                                                                                     |                                                                                                                                                     |
|---------------|-------------------------------------------------------------------------------------------------------------------------------------------------------------------------------------------------------------------------------------------------------------------------------------------------------------------------------------------------------------------------------------------------------------------------------------------------------------------------------------------------------------------------------------------------------------------------------------------------------------------------------------------------------------------------------------------------------------------------------------------------------------------------------------------------------------------------------------------------------------------------------------------------------------------------------------------------------------------------------------------------------------------------------------------------------------------------------------------------------------------------------------------------------------------------------------------------------------------------------------------------------------------------------------------------------------------------------------|-----------------------------------------------------------------------------------------------------------------------------------------------------|
|               | <p>omnesque regiones Regni Polonie sua mole cooperiens, homines, presertim agriculture deditos violento et grosso suo descensu plurimum exterruit, presertim dum usque in sextum diem sine aliqua resolutionis spe perdurasset, veritos, ne sub tam gravi mole et statera frumentorum germina imbre huiusmodi et nivibus exterminatumdevoratumque iri contigisset. Verum universis colonis ad tam inauditumspectaculum paventibus et fortunas suas atque labores perditum iri fletu et lamentis vociferantibus pietas Agni Celestis affuit et quod humanus intellectus et ratio ad interitum credebat descendisse et perniciem, id DIvina propiciacio, que ex insolitis operibus vilescentibus et nullam admiracionemafferentibus quotidianis vult laudari, vertit in augmentum et salutem. Nivosus suquidem ipse imber sexta die resolutus non solum fruges vernaes et hiemales, quibus insidebat, non lesit nec perculit, imo illas sua placida infusione quasi quodam rore suavissimo adeo rigavit vivificavit, ut nullum humanum ingenium per stercorisacionem proveniens tantam fecunditatem et ubertatem agris et frugibus afferre potuisset. Unde ex admodum terribili et tristi anno fecundus et hilaris, omnium abundanciam et locupletacionem secum ferens annus ipse apparuit et colonos eventu felicissimo refecit.</p> |                                                                                                                                                     |
| 1359, 24 June | Fuit maxima inundacio in terra Poloniae et in aliis locis circa festum Ioannis baptostae                                                                                                                                                                                                                                                                                                                                                                                                                                                                                                                                                                                                                                                                                                                                                                                                                                                                                                                                                                                                                                                                                                                                                                                                                                            | Rocznik Sędziwoja, [in:] Monumenta Poloniae Histoirca, v. 2, p. 880                                                                                 |
| 1359          | Fuit grandis inundatio aquarum                                                                                                                                                                                                                                                                                                                                                                                                                                                                                                                                                                                                                                                                                                                                                                                                                                                                                                                                                                                                                                                                                                                                                                                                                                                                                                      | Christophori Manlii Gorlicensis patricii commentariorum rerum Lusaticarum, [in:] Scriptores rerum Lusaticarum, ed. C.G. Hoffmann, 1719, v. 1, p. 19 |

411

412 Table S4. Pointer years of *Abies alba*, *Pinus sylvestris* and *Quercus* spp. for four historical regions: „-” –

413 negative; „+” - positive

| Year | <i>Quercus</i> spp. |               |               | <i>A. alba</i> | <i>P. sylvestris</i> |                     |
|------|---------------------|---------------|---------------|----------------|----------------------|---------------------|
|      | Greater Poland      | Lower Silesia | Lesser Poland | Lesser Poland  | Lesser Poland        | Kuyavian-Pomeranian |
| 1004 | -                   |               |               |                |                      |                     |
| 1007 | +                   |               |               |                |                      |                     |
| 1010 | +                   |               |               |                |                      |                     |
| 1016 | -                   |               |               |                |                      |                     |
| 1017 | -                   |               |               |                |                      |                     |
| 1028 |                     | -             |               |                |                      |                     |
| 1029 | -                   |               |               |                |                      |                     |

|      |   |   |   |   |   |   |
|------|---|---|---|---|---|---|
| 1030 | + | + |   |   |   |   |
| 1035 | + |   |   |   |   |   |
| 1036 | - |   |   |   |   |   |
| 1037 | + |   |   |   |   |   |
| 1039 | - |   |   |   |   |   |
| 1040 |   | + |   |   |   |   |
| 1052 | + |   |   |   |   |   |
| 1053 | - |   |   |   |   |   |
| 1058 | - | - |   |   |   |   |
| 1061 |   | + |   |   |   |   |
| 1070 | - |   |   |   |   |   |
| 1071 |   | + |   |   |   |   |
| 1078 |   | - |   |   |   |   |
| 1082 | + |   |   |   |   |   |
| 1083 |   | - |   |   |   |   |
| 1115 | + |   |   |   |   |   |
| 1118 | + |   |   |   |   |   |
| 1129 |   | - |   |   |   |   |
| 1142 |   | - |   |   |   |   |
| 1143 |   | + |   |   |   |   |
| 1153 | + |   |   |   |   |   |
| 1160 | + |   | + |   |   |   |
| 1162 |   |   | + |   |   |   |
| 1164 |   |   | - |   |   |   |
| 1165 |   |   | - |   |   |   |
| 1168 | + |   |   |   |   |   |
| 1172 |   | + |   | + |   |   |
| 1173 |   |   | - |   |   |   |
| 1177 | - | - |   |   |   |   |
| 1180 |   |   | - |   |   |   |
| 1183 |   |   | + |   |   |   |
| 1184 |   |   | - |   |   |   |
| 1186 | + | + | + |   |   |   |
| 1187 |   |   |   | + |   |   |
| 1188 | + |   |   |   | - |   |
| 1189 |   |   |   | - |   |   |
| 1190 |   |   | + |   | + |   |
| 1191 | + |   |   |   |   |   |
| 1192 | - |   |   |   | - |   |
| 1195 | + |   |   |   |   |   |
| 1202 | - |   |   |   |   |   |
| 1205 |   |   |   | - |   | - |
| 1206 |   | + |   | + |   |   |
| 1209 |   |   |   | - |   |   |
| 1210 |   | + |   |   |   |   |
| 1218 |   |   |   | + |   |   |
| 1219 |   | + |   |   |   | - |
| 1220 |   |   |   | + |   |   |
| 1224 |   |   |   | - |   |   |
| 1228 |   |   |   |   |   | - |
| 1231 |   | - |   | - |   |   |

|      |   |   |   |   |   |   |
|------|---|---|---|---|---|---|
| 1232 |   |   |   | - |   | - |
| 1233 |   |   |   |   | - |   |
| 1234 | + |   |   |   |   |   |
| 1235 |   |   |   | - |   |   |
| 1239 |   |   |   | + | + |   |
| 1241 |   |   |   | - |   | - |
| 1242 |   |   |   | + |   |   |
| 1245 |   |   |   | + |   |   |
| 1249 |   | + |   |   |   |   |
| 1250 |   |   |   | - |   |   |
| 1254 |   |   |   |   |   | - |
| 1255 |   | + |   |   |   | + |
| 1256 | - |   |   |   | - |   |
| 1259 |   |   | - |   |   |   |
| 1261 | + |   |   |   |   |   |
| 1264 |   |   |   | + |   |   |
| 1270 |   |   |   | - |   |   |
| 1271 |   | + | + | + |   |   |
| 1272 |   |   |   | - |   | - |
| 1275 |   |   | + | + |   |   |
| 1276 |   |   | - |   |   |   |
| 1279 |   |   | + |   |   |   |
| 1280 |   |   |   |   | + |   |
| 1284 |   |   |   | - |   |   |
| 1285 |   |   |   |   | + |   |
| 1290 |   |   |   | + |   |   |
| 1293 |   | - |   |   |   |   |
| 1294 |   |   | + |   |   |   |
| 1296 |   |   |   |   | - |   |
| 1304 |   |   | - |   |   |   |
| 1305 |   |   |   |   |   | - |
| 1307 |   | + | + |   |   |   |
| 1309 |   |   | + |   |   |   |
| 1311 |   |   |   |   |   | - |
| 1313 |   |   | + | + |   |   |
| 1314 |   |   | - |   |   |   |
| 1317 |   |   | - | - |   |   |
| 1325 |   | + | + |   |   |   |
| 1326 |   |   | - |   |   |   |
| 1327 |   |   | + |   |   |   |
| 1328 |   |   |   | - |   | - |
| 1331 |   |   |   | + |   |   |
| 1332 |   |   | - | - |   |   |
| 1333 |   |   |   | - |   |   |
| 1334 |   |   | + | + |   | - |
| 1335 |   |   | - |   |   |   |
| 1352 |   | - |   |   |   |   |
| 1361 |   |   | - | - | - |   |
| 1362 |   |   |   |   | + |   |
| 1363 |   |   |   |   | - | - |
| 1372 |   |   |   | - | - | - |

|      |   |   |   |   |   |   |
|------|---|---|---|---|---|---|
| 1374 |   |   |   | + |   |   |
| 1376 |   |   | + |   |   |   |
| 1377 |   |   |   |   |   | + |
| 1379 |   |   |   |   | - |   |
| 1380 |   |   |   |   |   | + |
| 1383 |   |   |   | + |   |   |
| 1387 |   |   | + |   |   |   |
| 1388 |   |   |   |   | - | - |
| 1390 |   | - |   |   |   |   |
| 1397 |   |   | - |   |   |   |
| 1401 | - | - | - |   |   |   |
| 1402 | + |   |   |   |   |   |
| 1403 |   |   |   | - |   |   |
| 1406 | + |   |   |   |   |   |
| 1407 |   | - |   |   |   | - |
| 1410 | + |   |   |   |   |   |
| 1413 |   | - |   |   |   |   |
| 1414 |   |   |   | - |   |   |
| 1417 |   |   |   | - | - | - |
| 1420 | - | - |   |   |   |   |
| 1421 | + | + |   |   |   |   |
| 1425 |   |   |   | + |   |   |
| 1429 | - |   |   |   |   |   |
| 1431 |   |   |   | - |   |   |
| 1432 |   | + |   |   |   |   |
| 1437 |   | - |   |   |   |   |
| 1438 |   |   |   |   |   | - |
| 1439 | - |   |   |   |   |   |
| 1440 |   |   |   | - |   |   |
| 1441 |   |   |   | + |   | + |
| 1445 |   | + |   | + |   |   |
| 1446 |   |   |   |   |   | - |
| 1447 |   |   |   |   |   | - |
| 1453 |   |   |   | - | - |   |
| 1456 |   |   | + | + |   |   |
| 1459 |   |   |   | + |   |   |
| 1460 |   |   |   | - | - |   |
| 1461 |   |   |   | + |   |   |
| 1464 |   |   | - |   |   |   |
| 1467 |   |   |   |   | + |   |
| 1469 |   |   | - |   |   |   |
| 1470 |   |   |   |   |   | - |
| 1471 |   |   |   | + |   |   |
| 1474 |   |   |   |   | - | - |
| 1475 |   |   |   |   | + |   |
| 1478 |   |   |   |   | + |   |
| 1481 |   |   |   |   | + |   |
| 1486 |   |   | + |   |   |   |
| 1491 |   |   |   | - |   |   |
| 1494 |   |   |   |   |   | - |
| 1495 |   |   |   |   | + | + |

414

|      |  |  |   |  |  |  |
|------|--|--|---|--|--|--|
| 1497 |  |  | - |  |  |  |
|------|--|--|---|--|--|--|
